# Supplementary material for: Unwarranted Variation in the Quality of Care for Patients With Diseases of the Thoracic Aorta
Source: PubMed Central journal article supplement — J Am Heart Assoc. 2017 Mar 14;6(3):e004913. doi: 10.1161/JAHA.116.004913 (PMC5524021; doi:10.1161/jaha.116.004913), 2017-03-14
Supplement: JAH3-6-e004913-s001.pdf [file JAH3-6-e004913-s001.pdf]

## ONLINE-ONLY SUPPLEMENTARY MATERIAL

Bottle A, Mariscalco G, Shaw MA, Benedetto U, Saratzis A, Mariani S, Bashir M, Aylin P, Jenkins D, Oo AY, Murphy GJ; on behalf of the UK Aortic Forum. Unwarranted variation in the quality of care for patients with diseases of the thoracic aorta.

|                                                                                                                                                                                                                                                                                                                           |                |
|---------------------------------------------------------------------------------------------------------------------------------------------------------------------------------------------------------------------------------------------------------------------------------------------------------------------------|----------------|
| <b>Supplemental Methods</b>                                                                                                                                                                                                                                                                                               | <b>Pag. 2</b>  |
| Data sources and study populations                                                                                                                                                                                                                                                                                        | 2              |
| <b>Supplemental Tables</b>                                                                                                                                                                                                                                                                                                | <b>Pag. 4</b>  |
| Table S1. The RECORD statement - checklist of items, extended from STROBE statement                                                                                                                                                                                                                                       | 4              |
| Table S2. MOOSE checklist for meta-analyses of observational studies                                                                                                                                                                                                                                                      | 9              |
| Table S3. PRISMA checklist of items to include when reporting a systematic review or meta-analysis                                                                                                                                                                                                                        | 11             |
| Table S4. List of ICD10 codes for the comorbidities used in the HES analysis                                                                                                                                                                                                                                              | 13             |
| Table S5. PICOS criteria for inclusion and exclusion of studies into meta-analysis                                                                                                                                                                                                                                        | 15             |
| Table S6. Risk factors for patients affected by thoracic aortic disease who received treatment and for patients who received non-emergent rather than emergent treatment (HES cohort)                                                                                                                                     | 16             |
| Table S7. Risk factors for six-month mortality in patients receiving treatment for thoracic aortic disease and in those not receiving any thoracic aortic treatment (HES cohort)                                                                                                                                          | 18             |
| Table S8. Baseline, operative and mortality details by most distal aortic segment (NACSA cohort)                                                                                                                                                                                                                          | 20             |
| Table S9. Hospital volume terciles by most distal aortic segment (calculated by mean 3 year annual activity) (NACSA cohort)                                                                                                                                                                                               | 22             |
| Table S10. Unadjusted and adjusted in-hospital mortality rates by aortic procedure and hospital volume (NACSA cohort)                                                                                                                                                                                                     | 23             |
| Table S11. Characteristics of the studies included in the systematic review                                                                                                                                                                                                                                               | 24             |
| Table S12. Study outcomes stratified by hospital and surgeon volume                                                                                                                                                                                                                                                       | 33             |
| Table S13. Study outcomes for study with defined a specific thoracic aortic program                                                                                                                                                                                                                                       | 35             |
| Table S14. Quality assessment of observational studies according the New-Ottawa Scale                                                                                                                                                                                                                                     | 36             |
| Table S15. List of variables included in the final multivariable model                                                                                                                                                                                                                                                    | 37             |
| <b>Supplemental Figures</b>                                                                                                                                                                                                                                                                                               | <b>Pag. 39</b> |
| Figure S1. Adjusted six-month mortality in patients affected by TAD receiving an operation (treated) and in those who did not (untreated) by county (HES cohort)                                                                                                                                                          | 39             |
| Figure S2. Centre activity by the most distal aortic segment (NACSA dataset)                                                                                                                                                                                                                                              | 40             |
| Figure S3. Correlation between the hospital activity (number of cases) and in-hospital mortality (NACSA dataset)                                                                                                                                                                                                          | 41             |
| Figure S4. PRISMA flow chart of search strategy                                                                                                                                                                                                                                                                           | 42             |
| Figure S5. Funnel plots showing the absence of publication bias                                                                                                                                                                                                                                                           | 43             |
| Figure S6. Forest plot for high volume versus low volume hospitals on operative mortality according to the primary aortic pathology (upper panel), and forest plot reporting risk adjusted estimates for high- versus low-volume hospitals on operative mortality according to the primary aortic pathology (lower panel) | 44             |
| Figure S7. Forest plots comparing the effect of hospital volume for secondary outcomes                                                                                                                                                                                                                                    | 45             |
| Figure S8. Forest plots comparing the effect of a multidisciplinary TAD program presence on outcomes                                                                                                                                                                                                                      | 46             |
| Figure S9. Forest plots comparing the effect of surgeon volume for hospital mortality and secondary outcomes Cumulative forest plots by NOS                                                                                                                                                                               | 47             |
| Figure S10. Forest plots comparing the effect of hospital status on hospital mortality                                                                                                                                                                                                                                    | 48             |
| <b>Supplemental References</b>                                                                                                                                                                                                                                                                                            | <b>Pag. 49</b> |

This supplementary material has been provided by the authors to give readers additional information about their work.

## Supplemental Methods

### Data sources and study populations

Data were extracted from the HES and the NICOR NACSA registry, according to The REporting of studies Conducted using Observational Routinely collected health Data (RECORD) statement.<sup>1</sup> The need to obtain informed consent from patients was waived by the University of Leicester Research Governance Office since the identifiable information was either removed or pseudonymized. The study was approved by the NICOR NACSA Research Board (study reference 14-ACS-25).

### HES cohort

Hospital Episodes Statistics is the national hospital administrative database for England and covers all admissions to public (NHS) hospitals in the country.<sup>2</sup> The data contain demographic, administrative and clinical information including procedures and operations. The database includes 20 diagnostic fields coded using ICD-10 and 24 procedure fields coded using the UK's own OPCS-4 system (Office of Population, Censuses and Surveys: Classification of interventions and procedures, 4th Revision). Admissions with a primary or secondary diagnosis code of TAD (ICD10 I710, I711, I712, I715, I716) or with a procedure for TAD repair (OPCS codes L181, L182, L191, L192, L201, L202, L208, L209, L211, L212, L273, L283, L221) were extracted for the financial years 2005/6 to 2010/11 inclusive (the most recent for which we had out-of-hospital deaths from the Office for National Statistics [ONS] files linked to HES) (Table S1 in the online-only Data Supplement). Using HES's anonymised patient identifier and admission dates, admissions were ordered chronologically by patient, with their first one between 2005/6 and 2010/11 flagged. After tracking back five years from this first TAD admission (back to 2000/1), patients were excluded if they had had a TAD admission or procedure during these five years. The remainder were considered index TAD admissions. We then tracked forward in time from these index admissions to capture any TAD procedures (surgery or endovascular procedures) within six months.

Outcomes of interest were: having an operation (surgical and/or endovascular) either during the index or within six months of it; having an elective rather than an emergency operation; post-operative mortality within six months; and mortality within six months in patients not having an operation. Death was defined as that in or out of hospital within six months of the index admission date.

For each patient, the postcode sector was mapped to a county via online look-ups between postcode sector and local authority and then local authority and county. "County" is actually unitary authority, but many retain their county names and we therefore refer to "county" throughout. Some had to be combined due to small numbers, finally leaving 40 counties (e.g., the Isle of Wight was merged with Hampshire).

### NACSA cohort

Prospectively collected data for all adult patients undergoing major aortic surgery were extracted from the NICOR NACSA registry (version 4.1.2) on 20th November 2014. All surgical procedures included in the study were performed in England between the 1st of April 2007 and the 31st of March 2013 and constituted the "complete-case" dataset. NICOR manage the audit and receive clinical direction and strategy from the Society for Cardiothoracic Surgery in Great Britain and Ireland (SCTS).<sup>16</sup> Reproducible cleaning algorithms were applied to the database.<sup>29,30</sup> Briefly, duplicate records and non-adult cardiac surgery entries were removed, transcriptional discrepancies harmonised and clinical and temporal conflicts and extreme values corrected or removed. The output from the pre-processing is regularly checked by reporting data summaries back to individual units for local validation and inspection as part of the NACSA in the UK.<sup>3-7</sup>

For each operation, records on patient characteristics and demographics, comorbidities, intraoperative factors, and postoperative outcomes were collected. Administrative data were also extracted including: patient admission, procedure and discharge dates and responsible consultant surgeon. For each record, calibrated logistic EuroSCORE was calculated.<sup>8</sup> Missing data were assumed to be absent for categorical variables or replaced with the mean value for continuous variables. Ejection fraction was the categorical variable with the highest incidence of missing data (3.5%). The proportions of missing data for continuous variables were: age, 0%; BMI, 3.6%; cardiopulmonary bypass time, 2.3%; and aortic cross clamp time, 2.9%. The primary outcome measure was in-hospital mortality, defined as death in hospital following the index surgical procedure and prior

to transfer from the cardiac surgery unit as per the definition used in the national audit. Therefore, records were excluded from the analysis if in-hospital mortality status was missing (n=32, 0.4%).

Operations were divided into four separate categories based on the operated segment most distal to the aortic valve included in the procedure, including the aortic root or ascending aorta, aortic arch, descending aorta, and the thoracoabdominal aorta. Elective, urgent or emergency procedures were all included. Where operational pathology was available, it was divided into three categories: aneurysm, dissection and "other", the latest containing the categories "trauma" and "other".

To complement the NACSA study we contacted the Society for Cardiothoracic Surgery Unit Representative for every cardiac surgery unit in England and asked 4 questions with respect to the current configuration of TAD services in their unit. The questions were: 1. Is there a dedicated Aortic Team? 2. Is there a specific on call rota for aortic emergencies? 3. Is there a hybrid operating theatre? 4. Is there a specific aortic multidisciplinary team (MDT) meeting recognized in the consultant job plans? Obtained data were cross-referenced with the NACSA data on aortic case-volume, complexity and outcomes. Statistical analysis

## Supplemental Tables

**Table S1. The RECORD statement – checklist of items, extended from the STROBE statement**

|                           | Item No. | STROBE items and Recommendation <sup>9</sup>                                                                                                                                                  | Location in manuscript where items are reported (pag.n.) | RECORD items and Recommendation <sup>1</sup>                                                                                                                                                                                                                                                                                                                                                                                                | Location in manuscript where items are reported (pag.n.) |
|---------------------------|----------|-----------------------------------------------------------------------------------------------------------------------------------------------------------------------------------------------|----------------------------------------------------------|---------------------------------------------------------------------------------------------------------------------------------------------------------------------------------------------------------------------------------------------------------------------------------------------------------------------------------------------------------------------------------------------------------------------------------------------|----------------------------------------------------------|
| <b>Title and abstract</b> |          |                                                                                                                                                                                               |                                                          |                                                                                                                                                                                                                                                                                                                                                                                                                                             |                                                          |
|                           | 1        | (a) Indicate the study's design with a commonly used term in the title or the abstract<br>(b) Provide in the abstract an informative and balanced summary of what was done and what was found | 1,2<br><br>2                                             | RECORD 1.1: The type of data used should be specified in the title or abstract. When possible, the name of the databases used should be included.<br><br>RECORD 1.2: If applicable, the geographic region and timeframe within which the study took place should be reported in the title or abstract.<br><br>RECORD 1.3: If linkage between databases was conducted for the study, this should be clearly stated in the title or abstract. | 1,2<br><br>1,2<br><br>1,2                                |
| <b>Introduction</b>       |          |                                                                                                                                                                                               |                                                          |                                                                                                                                                                                                                                                                                                                                                                                                                                             |                                                          |
| Background rationale      | 2        | Explain the scientific background and rationale for the investigation being reported                                                                                                          | 3                                                        |                                                                                                                                                                                                                                                                                                                                                                                                                                             | 3                                                        |
| Objectives                | 3        | State specific objectives, including any prespecified hypotheses                                                                                                                              | 3                                                        |                                                                                                                                                                                                                                                                                                                                                                                                                                             | 3                                                        |
| <b>Methods</b>            |          |                                                                                                                                                                                               |                                                          |                                                                                                                                                                                                                                                                                                                                                                                                                                             |                                                          |
| Study Design              | 4        | Present key elements of study design early in the paper                                                                                                                                       | 3,4<br>Supplemental Material                             |                                                                                                                                                                                                                                                                                                                                                                                                                                             |                                                          |
| Setting                   | 5        | Describe the setting, locations, and relevant dates, including periods of recruitment, exposure, follow-up, and data collection                                                               | 4,5<br>Supplemental Material                             |                                                                                                                                                                                                                                                                                                                                                                                                                                             |                                                          |
| Participants              | 6        | (a) <i>Cohort study</i> - Give the eligibility criteria, and the sources and methods                                                                                                          |                                                          | RECORD 6.1: The methods of study population selection (such as codes or                                                                                                                                                                                                                                                                                                                                                                     | 3,4<br>Supplemental Material                             |

|                              |    |                                                                                                                                                                                                                                                                                                                                                                                                                                                                                                                                                                                                                                         |                               |                                                                                                                                                                                                                                                                                                                                                                                                                                                                                                                                                                                                                              |                              |
|------------------------------|----|-----------------------------------------------------------------------------------------------------------------------------------------------------------------------------------------------------------------------------------------------------------------------------------------------------------------------------------------------------------------------------------------------------------------------------------------------------------------------------------------------------------------------------------------------------------------------------------------------------------------------------------------|-------------------------------|------------------------------------------------------------------------------------------------------------------------------------------------------------------------------------------------------------------------------------------------------------------------------------------------------------------------------------------------------------------------------------------------------------------------------------------------------------------------------------------------------------------------------------------------------------------------------------------------------------------------------|------------------------------|
|                              |    | <p>of selection of participants. Describe methods of follow-up</p> <p><i>Case-control study</i> - Give the eligibility criteria, and the sources and methods of case ascertainment and control selection. Give the rationale for the choice of cases and controls</p> <p><i>Cross-sectional study</i> - Give the eligibility criteria, and the sources and methods of selection of participants</p> <p><i>(b) Cohort study</i> - For matched studies, give matching criteria and number of exposed and unexposed</p> <p><i>Case-control study</i> - For matched studies, give matching criteria and the number of controls per case</p> |                               | <p>algorithms used to identify subjects) should be listed in detail. If this is not possible, an explanation should be provided.</p> <p>RECORD 6.2: Any validation studies of the codes or algorithms used to select the population should be referenced. If validation was conducted for this study and not published elsewhere, detailed methods and results should be provided.</p> <p>RECORD 6.3: If the study involved linkage of databases, consider use of a flow diagram or other graphical display to demonstrate the data linkage process, including the number of individuals with linked data at each stage.</p> |                              |
| Variables                    | 7  | Clearly define all outcomes, exposures, predictors, potential confounders, and effect modifiers. Give diagnostic criteria, if applicable.                                                                                                                                                                                                                                                                                                                                                                                                                                                                                               | 3,4<br>Supplemental Material  | RECORD 7.1: A complete list of codes and algorithms used to classify exposures, outcomes, confounders, and effect modifiers should be provided. If these cannot be reported, an explanation should be provided.                                                                                                                                                                                                                                                                                                                                                                                                              | 3,4<br>Supplemental Material |
| Data sources/<br>measurement | 8  | For each variable of interest, give sources of data and details of methods of assessment (measurement). Describe comparability of assessment methods if there is more than one group                                                                                                                                                                                                                                                                                                                                                                                                                                                    | 3,4,<br>Supplemental Material |                                                                                                                                                                                                                                                                                                                                                                                                                                                                                                                                                                                                                              |                              |
| Bias                         | 9  | Describe any efforts to address potential sources of bias                                                                                                                                                                                                                                                                                                                                                                                                                                                                                                                                                                               | Supplemental Material         |                                                                                                                                                                                                                                                                                                                                                                                                                                                                                                                                                                                                                              |                              |
| Study size                   | 10 | Explain how the study size was arrived at                                                                                                                                                                                                                                                                                                                                                                                                                                                                                                                                                                                               | 3,4                           |                                                                                                                                                                                                                                                                                                                                                                                                                                                                                                                                                                                                                              |                              |

|                                  |    |                                                                                                                                                                                                                                                                                                                                                                                                                                                                                                                                                                      |                              |                                                                                                                                                                                                                                                              |                              |
|----------------------------------|----|----------------------------------------------------------------------------------------------------------------------------------------------------------------------------------------------------------------------------------------------------------------------------------------------------------------------------------------------------------------------------------------------------------------------------------------------------------------------------------------------------------------------------------------------------------------------|------------------------------|--------------------------------------------------------------------------------------------------------------------------------------------------------------------------------------------------------------------------------------------------------------|------------------------------|
| Quantitative variables           | 11 | Explain how quantitative variables were handled in the analyses. If applicable, describe which groupings were chosen, and why                                                                                                                                                                                                                                                                                                                                                                                                                                        | 3,4<br>Supplemental Material |                                                                                                                                                                                                                                                              |                              |
| Statistical methods              | 12 | (a) Describe all statistical methods, including those used to control for confounding<br>(b) Describe any methods used to examine subgroups and interactions<br>(c) Explain how missing data were addressed<br>(d) <i>Cohort study</i> - If applicable, explain how loss to follow-up was addressed<br><i>Case-control study</i> - If applicable, explain how matching of cases and controls was addressed<br><i>Cross-sectional study</i> - If applicable, describe analytical methods taking account of sampling strategy<br>(e) Describe any sensitivity analyses | 5,6<br>Supplemental Material |                                                                                                                                                                                                                                                              |                              |
| Data access and cleaning methods |    | ..                                                                                                                                                                                                                                                                                                                                                                                                                                                                                                                                                                   |                              | RECORD 12.1: Authors should describe the extent to which the investigators had access to the database population used to create the study population.<br><br>RECORD 12.2: Authors should provide information on the data cleaning methods used in the study. | 3-6<br>Supplemental Material |
| Linkage                          |    | ..                                                                                                                                                                                                                                                                                                                                                                                                                                                                                                                                                                   |                              | RECORD 12.3: State whether the study included person-level, institutional-level, or other data linkage across two or more databases. The methods of linkage and methods of linkage quality evaluation should be provided.                                    | 3,4<br>Supplemental Material |
| <b>Results</b>                   |    |                                                                                                                                                                                                                                                                                                                                                                                                                                                                                                                                                                      |                              |                                                                                                                                                                                                                                                              |                              |
| Participants                     | 13 | (a) Report the numbers of individuals                                                                                                                                                                                                                                                                                                                                                                                                                                                                                                                                | 8-11                         | RECORD 13.1: Describe in detail the                                                                                                                                                                                                                          | 8-11                         |

|                  |    |                                                                                                                                                                                                                                                                                                                                                                                                                          |      |                                                                                                                                                                                                                                                                                |  |
|------------------|----|--------------------------------------------------------------------------------------------------------------------------------------------------------------------------------------------------------------------------------------------------------------------------------------------------------------------------------------------------------------------------------------------------------------------------|------|--------------------------------------------------------------------------------------------------------------------------------------------------------------------------------------------------------------------------------------------------------------------------------|--|
|                  |    | at each stage of the study ( <i>e.g.</i> , numbers potentially eligible, examined for eligibility, confirmed eligible, included in the study, completing follow-up, and analysed)<br>(b) Give reasons for non-participation at each stage.<br>(c) Consider use of a flow diagram                                                                                                                                         |      | selection of the persons included in the study ( <i>i.e.</i> , study population selection) including filtering based on data quality, data availability and linkage. The selection of included persons can be described in the text and/or by means of the study flow diagram. |  |
| Descriptive data | 14 | (a) Give characteristics of study participants ( <i>e.g.</i> , demographic, clinical, social) and information on exposures and potential confounders<br>(b) Indicate the number of participants with missing data for each variable of interest<br>(c) <i>Cohort study</i> - summarise follow-up time ( <i>e.g.</i> , average and total amount)                                                                          | 8-11 |                                                                                                                                                                                                                                                                                |  |
| Outcome data     | 15 | <i>Cohort study</i> - Report numbers of outcome events or summary measures over time<br><i>Case-control study</i> - Report numbers in each exposure category, or summary measures of exposure<br><i>Cross-sectional study</i> - Report numbers of outcome events or summary measures                                                                                                                                     | 8-11 |                                                                                                                                                                                                                                                                                |  |
| Main results     | 16 | (a) Give unadjusted estimates and, if applicable, confounder-adjusted estimates and their precision ( <i>e.g.</i> , 95% confidence interval). Make clear which confounders were adjusted for and why they were included<br>(b) Report category boundaries when continuous variables were categorized<br>(c) If relevant, consider translating estimates of relative risk into absolute risk for a meaningful time period | 8-11 |                                                                                                                                                                                                                                                                                |  |
| Other analyses   | 17 | Report other analyses done— <i>e.g.</i> ,                                                                                                                                                                                                                                                                                                                                                                                | 8-11 |                                                                                                                                                                                                                                                                                |  |

|                                                           |    |                                                                                                                                                                            |                       |                                                                                                                                                                                                                                                                                                          |                       |
|-----------------------------------------------------------|----|----------------------------------------------------------------------------------------------------------------------------------------------------------------------------|-----------------------|----------------------------------------------------------------------------------------------------------------------------------------------------------------------------------------------------------------------------------------------------------------------------------------------------------|-----------------------|
|                                                           |    | analyses of subgroups and interactions, and sensitivity analyses                                                                                                           | Supplemental Material |                                                                                                                                                                                                                                                                                                          |                       |
| <b>Discussion</b>                                         |    |                                                                                                                                                                            |                       |                                                                                                                                                                                                                                                                                                          |                       |
| Key results                                               | 18 | Summarise key results with reference to study objectives                                                                                                                   | 12,13                 |                                                                                                                                                                                                                                                                                                          |                       |
| Limitations                                               | 19 | Discuss limitations of the study, taking into account sources of potential bias or imprecision. Discuss both direction and magnitude of any potential bias                 | 13-15                 | RECORD 19.1: Discuss the implications of using data that were not created or collected to answer the specific research question(s). Include discussion of misclassification bias, unmeasured confounding, missing data, and changing eligibility over time, as they pertain to the study being reported. | 13-15                 |
| Interpretation                                            | 20 | Give a cautious overall interpretation of results considering objectives, limitations, multiplicity of analyses, results from similar studies, and other relevant evidence | 12,16                 |                                                                                                                                                                                                                                                                                                          |                       |
| Generalisability                                          | 21 | Discuss the generalisability (external validity) of the study results                                                                                                      | 16                    |                                                                                                                                                                                                                                                                                                          |                       |
| <b>Other Information</b>                                  |    |                                                                                                                                                                            |                       |                                                                                                                                                                                                                                                                                                          |                       |
| Funding                                                   | 22 | Give the source of funding and the role of the funders for the present study and, if applicable, for the original study on which the present article is based              | 17                    |                                                                                                                                                                                                                                                                                                          |                       |
| Accessibility of protocol, raw data, and programming code |    |                                                                                                                                                                            |                       | RECORD 22.1: Authors should provide information on how to access any supplemental information such as the study protocol, raw data, or programming code.                                                                                                                                                 | Supplemental Material |



**Table S2. MOOSE Checklist for Meta-analyses of Observational Studies<sup>10</sup>**

| Item N.                                            | Recommendation                                                                                                                                                                                                                                                               | Reported on Page N. |
|----------------------------------------------------|------------------------------------------------------------------------------------------------------------------------------------------------------------------------------------------------------------------------------------------------------------------------------|---------------------|
| <b>Reporting of background should include</b>      |                                                                                                                                                                                                                                                                              |                     |
| 1                                                  | Problem definition                                                                                                                                                                                                                                                           | 3                   |
| 2                                                  | Hypothesis statement                                                                                                                                                                                                                                                         | 3                   |
| 3                                                  | Description of study outcome(s)                                                                                                                                                                                                                                              | 4,5, tab S5         |
| 4                                                  | Type of exposure or intervention used                                                                                                                                                                                                                                        | 5, tab S5           |
| 5                                                  | Type of study designs used                                                                                                                                                                                                                                                   | 4,5                 |
| 6                                                  | Study population                                                                                                                                                                                                                                                             | 5                   |
| <b>Reporting of search strategy should include</b> |                                                                                                                                                                                                                                                                              |                     |
| 7                                                  | Qualifications of searchers (eg, librarians and investigators)                                                                                                                                                                                                               | 4,5                 |
| 8                                                  | Search strategy, including time period included in the synthesis and key words                                                                                                                                                                                               | 4,5                 |
| 9                                                  | Effort to include all available studies, including contact with authors                                                                                                                                                                                                      | Ref.#32             |
| 10                                                 | Databases and registries searched                                                                                                                                                                                                                                            | 5<br>Ref.#32        |
| 11                                                 | Search software used, name and version, including special features used (eg, explosion)                                                                                                                                                                                      | Ref.#32             |
| 12                                                 | Use of hand searching (eg, reference lists of obtained articles)                                                                                                                                                                                                             | Ref.#32             |
| 13                                                 | List of citations located and those excluded, including justification                                                                                                                                                                                                        | fig S4<br>Ref.#32   |
| 14                                                 | Method of addressing articles published in languages other than English                                                                                                                                                                                                      | Ref.#32             |
| 15                                                 | Method of handling abstracts and unpublished studies                                                                                                                                                                                                                         | Ref.#32             |
| 16                                                 | Description of any contact with authors                                                                                                                                                                                                                                      | Ref.#32             |
| <b>Reporting of methods should include</b>         |                                                                                                                                                                                                                                                                              |                     |
| 17                                                 | Description of relevance or appropriateness of studies assembled for assessing the hypothesis to be tested                                                                                                                                                                   | Ref.#32             |
| 18                                                 | Rationale for the selection and coding of data (eg, sound clinical principles or convenience)                                                                                                                                                                                | Ref.#32             |
| 19                                                 | Documentation of how data were classified and coded (eg, multiple raters, blinding and interrater reliability)                                                                                                                                                               | Ref.#32             |
| 20                                                 | Assessment of confounding (eg, comparability of cases and controls in studies where appropriate)                                                                                                                                                                             | Ref.#32             |
| 21                                                 | Assessment of study quality, including blinding of quality assessors, stratification or regression on possible predictors of study results                                                                                                                                   | 5<br>Ref.#32        |
| 22                                                 | Assessment of heterogeneity                                                                                                                                                                                                                                                  | Supplement          |
| 23                                                 | Description of statistical methods (eg, complete description of fixed or random effects models, justification of whether the chosen models account for predictors of study results, dose-response models, or cumulative meta-analysis) in sufficient detail to be replicated | Supplement          |
| 24                                                 | Provision of appropriate tables and graphics                                                                                                                                                                                                                                 | Supplement          |
| <b>Reporting of results should include</b>         |                                                                                                                                                                                                                                                                              |                     |
| 25                                                 | Graphic summarizing individual study estimates and overall estimate                                                                                                                                                                                                          | fig 4               |

|                                                |                                                                                                                           |            |
|------------------------------------------------|---------------------------------------------------------------------------------------------------------------------------|------------|
|                                                |                                                                                                                           | fig S9-13  |
| 26                                             | Table giving descriptive information for each study included                                                              | tab S11-13 |
| 27                                             | Results of sensitivity testing (eg, subgroup analysis)                                                                    | 11,12      |
| 28                                             | Indication of statistical uncertainty of findings                                                                         | 11,12      |
| <b>Reporting of discussion should include</b>  |                                                                                                                           |            |
| 29                                             | Quantitative assessment of bias (eg, publication bias)                                                                    | Supplement |
| 30                                             | Justification for exclusion (eg, exclusion of non-English language citations)                                             | Ref.#32    |
| 31                                             | Assessment of quality of included studies                                                                                 | tab S14    |
| <b>Reporting of conclusions should include</b> |                                                                                                                           |            |
| 32                                             | Consideration of alternative explanations for observed results                                                            | 13,14      |
| 33                                             | Generalization of the conclusions (ie, appropriate for the data presented and within the domain of the literature review) | 16         |
| 34                                             | Guidelines for future research                                                                                            | 16         |
| 35                                             | Disclosure of funding source                                                                                              | 17,18      |

**Table S3. PRISMA checklist of Items to Include when Reporting a Systematic Review or Meta-analysis<sup>11</sup>**

| Section/topic                      | #  | Checklist Item                                                                                                                                                                                                                                                                                              | Reported on Page # |
|------------------------------------|----|-------------------------------------------------------------------------------------------------------------------------------------------------------------------------------------------------------------------------------------------------------------------------------------------------------------|--------------------|
| <b>TITLE</b>                       |    |                                                                                                                                                                                                                                                                                                             |                    |
| Title                              | 1  | Identify the report as a systematic review, meta-analysis, or both.                                                                                                                                                                                                                                         | 1                  |
| <b>ABSTRACT</b>                    |    |                                                                                                                                                                                                                                                                                                             |                    |
| Structured summary                 | 2  | Provide a structured summary including, as applicable: background; objectives; data sources; study eligibility criteria, participants, and interventions; study appraisal and synthesis methods; results; limitations; conclusions and implications of key findings; systematic review registration number. | 2                  |
| <b>INTRODUCTION</b>                |    |                                                                                                                                                                                                                                                                                                             |                    |
| Rationale                          | 3  | Describe the rationale for the review in the context of what is already known.                                                                                                                                                                                                                              | 3                  |
| Objectives                         | 4  | Provide an explicit statement of questions being addressed with reference to participants, interventions, comparisons, outcomes, and study design (PICOS).                                                                                                                                                  | tab V              |
| <b>METHODS</b>                     |    |                                                                                                                                                                                                                                                                                                             |                    |
| Protocol and registration          | 5  | Indicate if a review protocol exists, if and where it can be accessed (e.g., Web address), and, if available, provide registration information including registration number.                                                                                                                               | 4,5<br>Ref.#32     |
| Eligibility criteria               | 6  | Specify study characteristics (e.g., PICOS, length of follow-up) and report characteristics (e.g., years considered, language, publication status) used as criteria for eligibility, giving rationale.                                                                                                      | 4,5<br>tab S5      |
| Information sources                | 7  | Describe all information sources (e.g., databases with dates of coverage, contact with study authors to identify additional studies) in the search and date last searched.                                                                                                                                  | 4,5<br>Ref.#32     |
| Search                             | 8  | Present full electronic search strategy for at least one database, including any limits used, such that it could be repeated.                                                                                                                                                                               | 5<br>Ref.#32       |
| Study selection                    | 9  | State the process for selecting studies (i.e., screening, eligibility, included in systematic review, and, if applicable, included in the meta-analysis).                                                                                                                                                   | 2<br>Ref.#32       |
| Data collection process            | 10 | Describe method of data extraction from reports (e.g., piloted forms, independently, in duplicate) and any processes for obtaining and confirming data from investigators.                                                                                                                                  | 5<br>Ref.#32       |
| Data items                         | 11 | List and define all variables for which data were sought (e.g., PICOS, funding sources) and any assumptions and simplifications made.                                                                                                                                                                       | Ref.#32            |
| Risk of bias in individual studies | 12 | Describe methods used for assessing risk of bias of individual studies (including specification of whether this was done at the study or outcome level), and how this information is to be used in any data synthesis.                                                                                      | Ref.#32            |

|                               |    |                                                                                                                                                                                                          |                     |
|-------------------------------|----|----------------------------------------------------------------------------------------------------------------------------------------------------------------------------------------------------------|---------------------|
| Summary measures              | 13 | State the principal summary measures (e.g., risk ratio, difference in means).                                                                                                                            | Supplement          |
| Synthesis of results          | 14 | Describe the methods of handling data and combining results of studies, if done, including measures of consistency (e.g., $I^2$ ) for each meta-analysis.                                                | Supplement          |
| Risk of bias across studies   | 15 | Specify any assessment of risk of bias that may affect the cumulative evidence (e.g., publication bias, selective reporting within studies).                                                             | Supplement          |
| Additional analyses           | 16 | Describe methods of additional analyses (e.g., sensitivity or subgroup analyses, meta-regression), if done, indicating which were pre-specified.                                                         | Supplement          |
| <b>RESULTS</b>                |    |                                                                                                                                                                                                          |                     |
| Study selection               | 17 | Give numbers of studies screened, assessed for eligibility, and included in the review, with reasons for exclusions at each stage, ideally with a flow diagram.                                          | 11,12               |
| Study characteristics         | 18 | For each study, present characteristics for which data were extracted and provide the citations.                                                                                                         | tab S11-13          |
| Risk of bias within studies   | 19 | Present data on risk of bias of each study and, if available, any outcome level assessment (see item 12).                                                                                                | tab S14             |
| Results of individual studies | 20 | For all outcomes considered (benefits or harms), present, for each study: (a) simple summary data for each intervention group (b) effect estimates and confidence intervals, ideally with a forest plot. | fig 4<br>tab S12-13 |
| Synthesis of results          | 21 | Present results of each meta-analysis done, including confidence intervals and measures of consistency.                                                                                                  | fig 4<br>fig S9-13  |
| Risk of bias across studies   | 22 | Present results of any assessment of risk of bias across studies (see Item 15).                                                                                                                          | tab S14-15          |
| Additional analysis           | 23 | Give results of additional analyses, if done (e.g., sensitivity or subgroup analyses, meta-regression [see Item 16]).                                                                                    | Supplement          |
| <b>DISCUSSION</b>             |    |                                                                                                                                                                                                          |                     |
| Summary of evidence           | 24 | Summarize the main findings including the strength of evidence for each main outcome; consider their relevance to key groups (e.g., healthcare providers, users, and policy makers).                     | 13                  |
| Limitations                   | 25 | Discuss limitations at study and outcome level (e.g., risk of bias), and at review-level (e.g., incomplete retrieval of identified research, reporting bias).                                            | 14-16               |
| Conclusions                   | 26 | Provide a general interpretation of the results in the context of other evidence, and implications for future research.                                                                                  | 16                  |
| <b>FUNDING</b>                |    |                                                                                                                                                                                                          |                     |
| Funding                       | 27 | Describe sources of funding for the systematic review and other support (e.g., supply of data); role of funders for the systematic review.                                                               | 17,18               |

**Table S4. List of ICD-10 codes for the comorbidities used in the HES analysis**

| <b>Code</b>                                                                 | <b>Description</b>                                                                                                                                                                                                                                                                                                                                                                                                                                                                                                                                                                                                                                                                                                                                                                                                                                                                                                                                                                                                                                                                                                                                                                |
|-----------------------------------------------------------------------------|-----------------------------------------------------------------------------------------------------------------------------------------------------------------------------------------------------------------------------------------------------------------------------------------------------------------------------------------------------------------------------------------------------------------------------------------------------------------------------------------------------------------------------------------------------------------------------------------------------------------------------------------------------------------------------------------------------------------------------------------------------------------------------------------------------------------------------------------------------------------------------------------------------------------------------------------------------------------------------------------------------------------------------------------------------------------------------------------------------------------------------------------------------------------------------------|
| <b>I10-I15 Hypertensive diseases</b>                                        | I10 Essential (primary) hypertension<br>I11 Hypertensive heart disease<br>I12 Hypertensive renal disease<br>I13 Hypertensive heart and renal disease<br>I15 Secondary hypertension                                                                                                                                                                                                                                                                                                                                                                                                                                                                                                                                                                                                                                                                                                                                                                                                                                                                                                                                                                                                |
| <b>I20-I25 Ischaemic heart diseases</b>                                     | I20 Angina pectoris<br>I21 Acute myocardial infarction<br>I22 Subsequent myocardial infarction<br>I23 Certain current complications following acute myocardial infarction<br>I24 Other acute ischaemic heart diseases<br>I25 Chronic ischaemic heart disease                                                                                                                                                                                                                                                                                                                                                                                                                                                                                                                                                                                                                                                                                                                                                                                                                                                                                                                      |
| <b>I30-I52 Other forms of heart disease</b>                                 | I34 Nonrheumatic mitral valve disorders<br>I35 Nonrheumatic aortic valve disorders<br>I36 Nonrheumatic tricuspid valve disorders<br>I37 Pulmonary valve disorders                                                                                                                                                                                                                                                                                                                                                                                                                                                                                                                                                                                                                                                                                                                                                                                                                                                                                                                                                                                                                 |
| <b>I60-I69 Cerebrovascular diseases</b>                                     | I60 Subarachnoid haemorrhage<br>I61 Intracerebral haemorrhage<br>I62 Other nontraumatic intracranial haemorrhage<br>I63 Cerebral infarction<br>I63.0 Cerebral infarction due to thrombosis of precerebral arteries<br>I63.1 Cerebral infarction due to embolism of precerebral arteries<br>I63.2 Cerebral infarction due to unspecified occlusion or stenosis of precerebral arteries<br>I63.3 Cerebral infarction due to thrombosis of cerebral arteries<br>I63.4 Cerebral infarction due to embolism of cerebral arteries<br>I63.5 Cerebral infarction due to unspecified occlusion or stenosis of cerebral arteries<br>I63.6 Cerebral infarction due to cerebral venous thrombosis, nonpyogenic<br>I63.8 Other cerebral infarction<br>I63.9 Cerebral infarction, unspecified<br>I64 Stroke, not specified as haemorrhage or infarction<br>I65 Occlusion and stenosis of precerebral arteries, not resulting in cerebral infarction<br>I66 Occlusion and stenosis of cerebral arteries, not resulting in cerebral infarction<br>I67 Other cerebrovascular diseases<br>I68 Cerebrovascular disorders in diseases classified elsewhere<br>I69 Sequelae of cerebrovascular disease |
| <b>I70 Atherosclerosis</b>                                                  | I70.0 Atherosclerosis of aorta<br>I70.1 Atherosclerosis of renal artery<br>I70.2 Atherosclerosis of arteries of extremities<br>I70.8 Atherosclerosis of other arteries<br>I70.9 Generalized and unspecified atherosclerosis                                                                                                                                                                                                                                                                                                                                                                                                                                                                                                                                                                                                                                                                                                                                                                                                                                                                                                                                                       |
| <b>I71 Aortic Aneurysms not affecting the thoracic aorta</b>                | I71.3 Abdominal aortic aneurysm, ruptured<br>I71.4 Abdominal aortic aneurysm, without mention of rupture<br>I71.8 Aortic aneurysm of unspecified site, ruptured<br>I71.9 Aortic aneurysm of unspecified site, without mention of rupture                                                                                                                                                                                                                                                                                                                                                                                                                                                                                                                                                                                                                                                                                                                                                                                                                                                                                                                                          |
| <b>I72 Other aneurysm and dissection (not affecting the thoracic aorta)</b> | I72.0 Aneurysm and dissection of carotid artery<br>I72.1 Aneurysm and dissection of artery of upper extremity<br>I72.2 Aneurysm and dissection of renal artery<br>I72.3 Aneurysm and dissection of iliac artery<br>I72.4 Aneurysm and dissection of artery of lower extremity<br>I72.5 Aneurysm and dissection of other precerebral arteries<br>I72.8 Aneurysm and dissection of other specified arteries<br>I72.9 Aneurysm and dissection of unspecified site                                                                                                                                                                                                                                                                                                                                                                                                                                                                                                                                                                                                                                                                                                                    |
| <b>I73 Other peripheral vascular diseases</b>                               | I73.0 Raynaud syndrome<br>I73.1 Thromboangiitis obliterans [Buerger]<br>I73.8 Other specified peripheral vascular diseases                                                                                                                                                                                                                                                                                                                                                                                                                                                                                                                                                                                                                                                                                                                                                                                                                                                                                                                                                                                                                                                        |

|                                                                                               |                                                                                                                                                                                                                                                                                                                                                                                                                                                                                                                                 |
|-----------------------------------------------------------------------------------------------|---------------------------------------------------------------------------------------------------------------------------------------------------------------------------------------------------------------------------------------------------------------------------------------------------------------------------------------------------------------------------------------------------------------------------------------------------------------------------------------------------------------------------------|
|                                                                                               | I73.9 Peripheral vascular disease, unspecified                                                                                                                                                                                                                                                                                                                                                                                                                                                                                  |
| <b>I77 Other disorders of arteries and arterioles</b>                                         | I77.6 Arteritis, unspecified<br>I77.8 Other specified disorders of arteries and arterioles<br>I77.2 Rupture of artery                                                                                                                                                                                                                                                                                                                                                                                                           |
| <b>I79 Disorders of arteries, arterioles and capillaries in diseases classified elsewhere</b> | I79.0 Aneurysm of aorta in diseases classified elsewhere<br>I79.1 Aortitis in diseases classified elsewhere<br>I79.2 Peripheral angiopathy in diseases classified elsewhere<br>I79.8 Other disorders of arteries, arterioles and capillaries in diseases classified elsewhere                                                                                                                                                                                                                                                   |
| <b>Q20-Q28 Congenital malformations of the circulatory system</b>                             | Q20 Congenital malformations of cardiac chambers and connections<br>Q21 Congenital malformations of cardiac septa<br>Q22 Congenital malformations of pulmonary and tricuspid valves<br>Q23 Congenital malformations of aortic and mitral valves<br>Q24 Other congenital malformations of heart<br>Q25 Congenital malformations of great arteries<br>Q26 Congenital malformations of great veins<br>Q27 Other congenital malformations of peripheral vascular system<br>Q28 Other congenital malformations of circulatory system |
| <b>Q79.6 Ehlers-Danlos syndrome</b>                                                           |                                                                                                                                                                                                                                                                                                                                                                                                                                                                                                                                 |
| <b>Q87 Other specified congenital malformation syndromes affecting multiple systems</b>       | Q87.4 Marfan syndrome<br>Q87.5 Other congenital malformation syndromes with other skeletal changes<br>Q87.8 Other specified congenital malformation syndromes, not elsewhere classified                                                                                                                                                                                                                                                                                                                                         |
| <b>J40-J44 Chronic obstructive pulmonary disease</b>                                          | J40 Bronchitis, not specified as acute or chronic<br>J41 Simple and mucopurulent chronic bronchitis<br>J42 Unspecified chronic bronchitis<br>J43 Emphysema<br>J44 Other chronic obstructive pulmonary disease                                                                                                                                                                                                                                                                                                                   |
| <b>E10-E14 Diabetes mellitus</b>                                                              | E10 Insulin-dependent diabetes mellitus<br>E11 Non-insulin-dependent diabetes mellitus<br>E12 Malnutrition-related diabetes mellitus<br>E13 Other specified diabetes mellitus<br>E14 Unspecified diabetes mellitus                                                                                                                                                                                                                                                                                                              |
| <b>E66 Obesity</b>                                                                            |                                                                                                                                                                                                                                                                                                                                                                                                                                                                                                                                 |
| <b>E78 Disorders of lipoprotein metabolism and other lipidaemias</b>                          |                                                                                                                                                                                                                                                                                                                                                                                                                                                                                                                                 |

**Table S5. PICOS criteria for inclusion and exclusion of studies into meta-analysis**

| Parameter            | Inclusion criteria                                                                                                                                                                                  | Exclusion criteria                                                                                                                     |
|----------------------|-----------------------------------------------------------------------------------------------------------------------------------------------------------------------------------------------------|----------------------------------------------------------------------------------------------------------------------------------------|
| <b>Patients</b>      | Adult patients affected by TAD                                                                                                                                                                      | Patients affected by other cardiac diseases other than TAD                                                                             |
| <b>Intervention*</b> | Open surgery or endovascular repair of TAD                                                                                                                                                          | Study without definition of volume activity                                                                                            |
| <b>Comparator</b>    | Hospital volume activity                                                                                                                                                                            | -                                                                                                                                      |
| <b>Outcomes</b>      | <u>Primary</u> : in-hospital/30-day mortality (all cause)<br><u>Secondary</u> : postoperative stroke; re-exploration for bleeding/tamponade; postoperative renal failure; length of hospitalization | Late mortality                                                                                                                         |
| <b>Study design</b>  | Clinical randomised trials<br>Controlled before-and-after studies<br>Prospective and retrospective cohort studies<br>Cross-sectional studies<br>Case-control studies                                | Repeat publications of the same analysis or dataset<br>Conference abstracts<br>Editorials & opinion pieces<br>Books or grey literature |

Abbreviations: TAD, thoracic aortic disease.

\* Main intervention/comparator; other intervention/comparator: surgeon volume (high- vs. low-volume); teaching hospital status (teaching vs. non-teaching); urban hospital status (urban vs. rural); aortic dedicated team presence (aortic team vs. no-aortic team); dedicated thoracic aortic surgery program (program vs. no program); presence of cardiothoracic unit along with hybrid room.

**Table S6. Risk factors for patients affected by thoracic aortic disease who received treatment and for patients who received non-emergent rather than emergent treatment (HES cohort)**

| Factor                                        |                    | Receiving treatment |         | Receiving non-emergent rather than emergency treatment |         |
|-----------------------------------------------|--------------------|---------------------|---------|--------------------------------------------------------|---------|
|                                               | Value              | OR (95% CI)         | P-value | OR (95% CI)                                            | P-value |
| Age                                           | 0-39               | 2.15 (1.82 to 2.53) | <.0001  | 0.68 (0.50 to 0.91)                                    | 0.01    |
|                                               | 40-44              | 1.55 (1.27 to 1.90) | <.0001  | 1.12 (0.77 to 1.64)                                    | 0.5504  |
|                                               | 45-49              | 1.36 (1.13 to 1.64) | 0.0012  | 0.98 (0.68 to 1.40)                                    | 0.9022  |
|                                               | 50-54              | 1.32 (1.12 to 1.56) | 0.0011  | 0.98 (0.71 to 1.34)                                    | 0.8743  |
|                                               | 55-59              | 1.35 (1.17 to 1.56) | <.0001  | 0.88 (0.67 to 1.16)                                    | 0.3626  |
|                                               | 60-64              | 1.16 (1.01 to 1.32) | 0.0315  | 0.87 (0.67 to 1.12)                                    | 0.2699  |
|                                               | 65-69              | 1                   |         | 1                                                      |         |
|                                               | 70-74              | 0.84 (0.75 to 0.95) | 0.0041  | 0.88 (0.70 to 1.10)                                    | 0.2626  |
|                                               | 75-79              | 0.61 (0.54 to 0.69) | <.0001  | 0.85 (0.67 to 1.07)                                    | 0.1621  |
|                                               | 80-84              | 0.29 (0.25 to 0.33) | <.0001  | 0.52 (0.39 to 0.68)                                    | <.0001  |
|                                               | 85-89              | 0.11 (0.09 to 0.14) | <.0001  | 0.29 (0.18 to 0.46)                                    | <.0001  |
|                                               | 90+                | 0.02 (0.01 to 0.04) | <.0001  | 0.37 (0.09 to 1.45)                                    | 0.1516  |
| Sex                                           | Female             | 1.04 (0.97 to 1.12) | 0.2385  | 1.00 (0.87 to 1.15)                                    | 0.9975  |
|                                               | Male               | 1                   |         | 1                                                      |         |
| Year                                          | 2004               | 1.24 (1.09 to 1.40) | 0.0009  | 0.88 (0.69 to 1.13)                                    | 0.3185  |
| Year                                          | 2005               | 1.30 (1.15 to 1.47) | <.0001  | 0.84 (0.66 to 1.06)                                    | 0.1313  |
| Year                                          | 2006               | 1.36 (1.20 to 1.53) | <.0001  | 0.75 (0.60 to 0.94)                                    | 0.0131  |
| Year                                          | 2007               | 1.21 (1.07 to 1.35) | 0.0014  | 0.83 (0.66 to 1.04)                                    | 0.1012  |
| Year                                          | 2008               | 1.01 (0.90 to 1.13) | 0.8694  | 0.97 (0.77 to 1.21)                                    | 0.7698  |
| Year                                          | 2009               | 0.98 (0.87 to 1.09) | 0.6823  | 0.93 (0.74 to 1.16)                                    | 0.5082  |
| Year                                          | 2010               | 1                   |         | 1                                                      |         |
| Deprivation                                   | 1 (least deprived) | 1                   |         | 1                                                      |         |
| Deprivation                                   | 2                  | 0.95 (0.86 to 1.04) | 0.2541  | 1.05 (0.87 to 1.26)                                    | 0.6245  |
| Deprivation                                   | 3                  | 0.88 (0.79 to 0.97) | 0.0093  | 0.74 (0.61 to 0.90)                                    | 0.0021  |
| Deprivation                                   | 4                  | 0.82 (0.73 to 0.91) | 0.0001  | 0.83 (0.68 to 1.01)                                    | 0.0605  |
| Deprivation                                   | 5 (most deprived)  | 0.69 (0.62 to 0.78) | <.0001  | 0.61 (0.49 to 0.76)                                    | <.0001  |
| Atherosclerosis                               |                    | 1.45 (1.24 to 1.68) | <.0001  | 0.98 (0.74 to 1.29)                                    | 0.8616  |
| Cancer                                        |                    | 0.70 (0.62 to 0.80) | <.0001  | 1.25 (0.97 to 1.60)                                    | 0.0847  |
| Congenital malformation circulatory disorders |                    | 1.17 (1.03 to 1.34) | 0.0182  | 1.82 (1.43 to 2.31)                                    | <.0001  |
| COPD                                          |                    | 0.64 (0.57 to 0.71) | <.0001  | 0.79 (0.63 to 0.98)                                    | 0.0332  |
| Cerebrovascular disease                       |                    | 0.83 (0.73 to 0.94) | 0.0025  | 0.86 (0.67 to 1.11)                                    | 0.2421  |
| Diabetes                                      |                    | 0.82 (0.73 to 0.93) | 0.0019  | 1.02 (0.80 to 1.30)                                    | 0.8775  |
| Hypertension                                  |                    | 1.04 (0.97 to 1.12) | 0.3026  | 1.15 (1.00 to 1.33)                                    | 0.0444  |
| Ischaemic heart disease                       |                    | 0.84 (0.78 to 0.91) | <.0001  | 1.38 (1.20 to 1.60)                                    | <.0001  |
| Lipid disorders                               |                    | 1.06 (0.97 to 1.15) | 0.1928  | 1.57 (1.33 to 1.84)                                    | <.0001  |
| Other aneurysm                                |                    | 1.07 (0.86 to 1.34) | 0.5549  | 0.86 (0.58 to 1.28)                                    | 0.4506  |
| Other aortic disease                          |                    | 2.42 (2.24 to 2.63) | <.0001  | 1.32 (1.15 to 1.53)                                    | 0.0001  |
| Disorders of other arteries                   |                    | 2.04 (1.05 to 2.77) | <.0001  | 0.30 (0.18 to 0.49)                                    | <.0001  |
| Other congenital malformation                 |                    | 0.90 (0.72 to 1.12) | 0.3464  | 3.17 (2.04 to 4.91)                                    | <.0001  |
| Other IHD                                     |                    | 1.41 (1.31 to 1.51) | <.0001  | 1.52 (1.33 to 1.74)                                    | <.0001  |



|                      |  |                     |        |                     |        |
|----------------------|--|---------------------|--------|---------------------|--------|
| <b>Other PVD</b>     |  | 0.90 (0.78 to 1.05) | 0.1857 | 0.85 (0.64 to 1.14) | 0.2802 |
| <b>Renal disease</b> |  | 0.58 (0.50 to 0.68) | <.0001 | 0.74 (0.55 to 1.00) | 0.0466 |
| <b>Dissection</b>    |  | 0.71 (0.66 to 0.77) | <.0001 | 0.06 (0.05 to 0.08) | <.0001 |

Abbreviations: CI, confidence interval; COPD, chronic pulmonary disease; HES, hospital episodes statistics; IHD, ischemic heart disease; OR, odds ratio; PVD, peripheral vascular disease.

**Table S7. Risk factors for 6-month mortality in patients receiving treatment for thoracic aortic disease and in those not receiving any thoracic aortic treatment (HES cohort)**

| Factor                                        |                    | Mortality in those receiving treatment |         | Mortality in those not receiving treatment |         |
|-----------------------------------------------|--------------------|----------------------------------------|---------|--------------------------------------------|---------|
|                                               | Value              | OR (95% CI)                            | p value | OR (95% CI)                                | p value |
| Age                                           | 0-39               | 0.75 (0.51 to 1.10)                    | 0.1407  | 0.45 (0.33 to 0.61)                        | <.0001  |
| Age                                           | 40-44              | 0.37 (0.20 to 0.67)                    | 0.0011  | 0.70 (0.50 to 0.98)                        | 0.0351  |
| Age                                           | 45-49              | 0.41 (0.24 to 0.71)                    | 0.0014  | 0.49 (0.35 to 0.67)                        | <.0001  |
| Age                                           | 50-54              | 0.60 (0.39 to 0.93)                    | 0.0211  | 0.57 (0.43 to 0.75)                        | <.0001  |
| Age                                           | 55-59              | 0.77 (0.55 to 1.08)                    | 0.1307  | 0.72 (0.58 to 0.90)                        | 0.0039  |
| Age                                           | 60-64              | 0.93 (0.69 to 1.26)                    | 0.6272  | 0.89 (0.74 to 1.08)                        | 0.2349  |
| Age                                           | 65-69              | 1                                      |         | 1                                          |         |
| Age                                           | 70-74              | 1.12 (0.85 to 1.46)                    | 0.4236  | 1.32 (1.14 to 1.54)                        | 0.0003  |
| Age                                           | 75-79              | 1.35 (1.03 to 1.77)                    | 0.0272  | 1.66 (1.44 to 1.92)                        | <.0001  |
| Age                                           | 80-84              | 1.57 (1.14 to 2.16)                    | 0.0057  | 2.03 (1.77 to 2.34)                        | <.0001  |
| Age                                           | 85+                | 2.72 (1.71 to 4.32)                    | <.0001  | 2.85 (2.47 to 3.28)                        | <.0001  |
| sex                                           | Female             | 0.96 (0.81 to 1.13)                    | 0.6129  | 0.79 (0.74 to 0.85)                        | <.0001  |
| sex                                           | Male               | 1                                      |         | 1                                          |         |
| Year                                          | 2004               | 1.38 (1.02 to 1.85)                    | 0.0343  | 1.70 (1.50 to 1.94)                        | <.0001  |
| Year                                          | 2005               | 1.84 (1.39 to 2.44)                    | <.0001  | 1.65 (1.46 to 1.88)                        | <.0001  |
| Year                                          | 2006               | 1.20 (0.90 to 1.59)                    | 0.2115  | 1.40 (1.23 to 1.58)                        | <.0001  |
| Year                                          | 2007               | 1.20 (0.91 to 1.58)                    | 0.2048  | 1.21 (1.07 to 1.37)                        | 0.0021  |
| Year                                          | 2008               | 1.16 (0.87 to 1.53)                    | 0.3118  | 1.13 (1.00 to 1.27)                        | 0.0445  |
| Year                                          | 2009               | 0.97 (0.73 to 1.29)                    | 0.8283  | 1.03 (0.92 to 1.16)                        | 0.5994  |
| Year                                          | 2010               | 1                                      |         | 1                                          |         |
| Elective adm                                  | No                 | 0.29 (0.24 to 0.34)                    | <.0001  | 0.26 (0.23 to 0.28)                        | <.0001  |
| Elective adm                                  | Yes                | 1                                      |         | 1                                          |         |
| Deprivation                                   | 1 (least deprived) | 1                                      |         | 1                                          |         |
| Deprivation                                   | 2                  | 1.11 (0.88 to 1.40)                    | 0.3893  | 1.02 (0.91 to 1.14)                        | 0.7717  |
| Deprivation                                   | 3                  | 1.18 (0.94 to 1.50)                    | 0.1581  | 1.12 (1.00 to 1.25)                        | 0.0413  |
| Deprivation                                   | 4                  | 1.20 (0.94 to 1.53)                    | 0.1517  | 1.18 (1.05 to 1.32)                        | 0.0047  |
| Deprivation                                   | 5 (most deprived)  | 1.13 (0.86 to 1.49)                    | 0.3757  | 1.11 (0.98 to 1.25)                        | 0.0877  |
| Atherosclerosis                               |                    | 1.73 (1.27 to 2.35)                    | 0.0005  | 1.17 (0.99 to 1.38)                        | 0.0658  |
| Cancer                                        |                    | 1.72 (1.31 to 2.27)                    | 0.0001  | 1.65 (1.49 to 1.83)                        | <.0001  |
| Congenital malformation circulatory disorders |                    | 0.88 (0.62 to 1.24)                    | 0.4621  | 0.70 (0.51 to 0.94)                        | 0.0188  |
| COPD                                          |                    | 1.37 (1.07 to 1.74)                    | 0.0126  | 1.28 (1.17 to 1.40)                        | <.0001  |
| Cerebrovascular disease                       |                    | 1.92 (1.50 to 2.46)                    | <.0001  | 1.25 (1.13 to 1.39)                        | <.0001  |
| Diabetes                                      |                    | 1.25 (0.95 to 1.65)                    | 0.1103  | 1.06 (0.94 to 1.18)                        | 0.3545  |
| Hypertension                                  |                    | 0.85 (0.71 to 1.00)                    | 0.0508  | 0.93 (0.86 to 1.00)                        | 0.0557  |
| Ischaemic heart disease                       |                    | 1.45 (1.22 to 1.72)                    | <.0001  | 0.81 (0.75 to 0.87)                        | <.0001  |
| Lipid disorders                               |                    | 0.77 (0.63 to 0.94)                    | 0.0092  | 0.73 (0.66 to 0.80)                        | <.0001  |
| Other aneurysm                                |                    | 1.05 (0.65 to 1.70)                    | 0.8285  | 1.09 (0.85 to 1.39)                        | 0.5058  |
| Other aortic disease                          |                    | 1.17 (0.97 to 1.40)                    | 0.0969  | 1.18 (1.07 to 1.29)                        | 0.0008  |
| Disorders of other arteries                   |                    | 0.92 (0.52 to 1.64)                    | 0.7854  | 1.02 (0.68 to 1.53)                        | 0.9235  |
| Other congenital malformation                 |                    | 0.71 (0.38 to 1.34)                    | 0.2933  | 0.68 (0.43 to 1.07)                        | 0.096   |

|                      |  |                     |        |                     |        |
|----------------------|--|---------------------|--------|---------------------|--------|
| <b>Other IHD</b>     |  | 1.00 (0.85 to 1.18) | 0.9932 | 1.15 (1.07 to 1.23) | 0.0002 |
| <b>Other PVD</b>     |  | 1.28 (0.93 to 1.78) | 0.1332 | 1.44 (1.25 to 1.66) | <.0001 |
| <b>Renal disease</b> |  | 2.11 (1.56 to 2.85) | <.0001 | 1.55 (1.38 to 1.73) | <.0001 |
| <b>Dissection</b>    |  | 1.07 (0.88 to 1.30) | 0.509  | 1.83 (1.69 to 1.98) | <.0001 |

Abbreviations: Adm, admission; CI, confidence interval; COPD, chronic pulmonary disease; HES, hospital episodes statistics; IHD, ischemic heart disease; OR, odds ratio; PVD, peripheral vascular disease.

**Table S8. Baseline, operative and mortality details by most distal aortic segment (NACSA cohort)**

| <b>Variables*</b>              | <b>Root/Ascending Aorta<br/>(n = 6848)</b> | <b>Aortic Arch<br/>(n = 762)</b> | <b>Descending Aorta<br/>(n = 320)</b> | <b>Thoracoabdominal<br/>(n = 128)</b> |
|--------------------------------|--------------------------------------------|----------------------------------|---------------------------------------|---------------------------------------|
| <b>Demographics</b>            |                                            |                                  |                                       |                                       |
| Age at operation (years)       | 64 (51, 73)                                | 68 (57, 74)                      | 62 (45, 71)                           | 63 (48, 70)                           |
| BMI (kg/m <sup>2</sup> )       | 26.9 (24.1, 30.1)                          | 26.5 (23.8, 29.8)                | 26.1 (23.4, 29.3)                     | 25.0 (21.8, 28.3)                     |
| Female gender                  | 2216 (32.4)                                | 308 (40.4)                       | 117 (36.6)                            | 50 (39.1)                             |
| <b>Co-morbidities</b>          |                                            |                                  |                                       |                                       |
| Unstable angina                | 332 (4.9)                                  | 29 (3.8)                         | 7 (2.2)                               | 4 (3.1)                               |
| NYHA ≥ III class               | 2075 (30.3)                                | 165 (21.7)                       | 58 (18.1)                             | 18 (14.1)                             |
| MI within 90 days of operation | 246 (3.6)                                  | 15 (2.0)                         | 0 (0)                                 | 7 (5.5)                               |
| Previous cardiac surgery       | 984 (14.4)                                 | 121 (15.9)                       | 113 (35.3)                            | 34 (26.6)                             |
| Previous aortic surgery        | 199 (2.9)                                  | 59 (7.7)                         | 60 (18.8)                             | 17 (13.3)                             |
| Diabetes                       | 487 (7.1)                                  | 44 (5.8)                         | 14 (4.4)                              | 8 (6.3)                               |
| Current smoker                 | 749 (10.9)                                 | 90 (11.8)                        | 46 (14.4)                             | 22 (17.2)                             |
| Hypertension                   | 4148 (60.6)                                | 569 (74.7)                       | 231 (72.2)                            | 88 (68.8)                             |
| Creatinine > 200 (μmol/l)      | 190 (2.8)                                  | 22 (2.9)                         | 7 (2.2)                               | 5 (3.9)                               |
| History of renal dysfunction   | 106 (1.6)                                  | 19 (2.5)                         | 6 (1.9)                               | 3 (2.3)                               |
| History of pulmonary disease   | 783 (11.4)                                 | 111 (14.6)                       | 47 (14.7)                             | 33 (25.8)                             |
| History of stroke              | 558 (8.2)                                  | 80 (10.5)                        | 19 (5.9)                              | 4 (3.1)                               |
| Neurological dysfunction       | 252 (3.7)                                  | 38 (5.0)                         | 14 (4.4)                              | 2 (1.6)                               |
| Peripheral vascular disease    | 909 (13.3)                                 | 242 (31.8)                       | 104 (32.5)                            | 57 (44.5)                             |
| Non sinus cardiac rhythm       | 828 (12.1)                                 | 85 (11.2)                        | 19 (5.9)                              | 6 (4.7)                               |
| Triple vessel disease          | 318 (4.6)                                  | 35 (4.6)                         | 6 (1.9)                               | 12 (9.4)                              |
| Left main stem disease         | 138 (2.0)                                  | 8 (1.1)                          | 2 (0.6)                               | 4 (3.1)                               |
| Moderate LVEF (30-50%)         | 1418 (20.7)                                | 125 (16.4)                       | 29 (9.1)                              | 12 (9.4)                              |
| Poor LVEF (<30%)               | 308 (4.5)                                  | 17 (2.2)                         | 3 (0.9)                               | 0 (0)                                 |
| PA systolic > 60mmHg           | 90 (1.3)                                   | 4 (0.5)                          | 0 (0)                                 | 0 (0)                                 |
| Pre-operative IV nitrates      | 324 (4.7)                                  | 60 (7.9)                         | 19 (5.9)                              | 8 (6.3)                               |

|                                   |                |                |               |                |
|-----------------------------------|----------------|----------------|---------------|----------------|
| Pre-operative IV inotropes        | 187 (2.7)      | 15 (2.0)       | 18 (5.6)      | 6 (4.7)        |
| Pre-operative ventilation         | 138 (2.0)      | 15 (2.0)       | 13 (4.1)      | 0 (0)          |
| Pre-operative cardiogenic shock   | 306 (4.5)      | 24 (3.2)       | 10 (3.1)      | 2 (1.6)        |
| <b>Operative details</b>          |                |                |               |                |
| Non-elective priority             | 2438 (35.6)    | 317 (41.6)     | 141 (44.1)    | 45 (35.2)      |
| Urgent priority                   | 1076 (15.7)    | 127 (16.7)     | 64 (20.0)     | 28 (21.9)      |
| Emergency priority                | 1249 (18.2)    | 177 (23.2)     | 68 (21.3)     | 16 (12.5)      |
| Salvage priority                  | 113 (1.7)      | 13 (1.7)       | 9 (2.8)       | 1 (0.8)        |
| Concomitant CABG operation        | 1334 (19.5)    | 122 (16.0)     | 12 (3.8)      | 14 (10.9)      |
| Concomitant valve operation       | 4963 (72.5)    | 326 (42.8)     | 24 (7.5)      | 6 (4.7)        |
| Concomitant 'other' operation     | 2320 (33.9)    | 188 (24.7)     | 99 (30.9)     | 39 (30.5)      |
| <b>Dominant pathology</b>         |                |                |               |                |
| Aneurysm                          | 3800 (55.5)    | 410 (53.8)     | 138 (43.1)    | 74 (57.8)      |
| Dissection                        | 1410 (20.6)    | 269 (35.3)     | 93 (29.1)     | 47 (36.7)      |
| Trauma                            | 27 (0.4)       | 4 (0.5)        | 19 (5.9)      | 0 (0)          |
| 'Other'                           | 1113 (16.3)    | 58 (7.6)       | 58 (18.1)     | 5 (3.9)        |
| Data N/A                          | 498 (7.3)      | 21 (2.8)       | 12 (3.8)      | 2 (1.6)        |
| CPB time (minutes)                | 157 (116, 216) | 205 (152, 266) | 184 (78, 260) | 164 (110, 227) |
| ACC time (minutes)                | 107 (79, 142)  | 112 (70, 156)  | 42 (0, 100)   | 27 (0, 117)    |
| Circulatory arrest time (minutes) | 25 (18, 33)    | 28 (18, 46)    | 36 (28, 57)   | 27 (15, 42)    |
| <b>Outcome</b>                    |                |                |               |                |
| In-hospital mortality             | 569 (8.3)      | 101 (13.3)     | 49 (15.3)     | 29 (22.7)      |

Abbreviations: ACC, aortic cross clamp time; CABG, coronary artery bypass grafting; CPB, cardiopulmonary bypass; LVEF, left ventricle ejection fraction; N/A, not available; NACSA, National Adult Cardiac Surgery Audit; NYHA, New York Heart Association; PA, pulmonary artery.

\*Numerical data are expressed as median and interquartile range (IQR); categorical data as absolute number (percentage).

**Table S9. Hospital volume tertiles by most distal aortic segment (calculated by mean 3 year annual activity) (NACSA cohort)**

| <i>Tertiles of activity*</i>                 | Low volume                | Medium volume              | High volume                  |
|----------------------------------------------|---------------------------|----------------------------|------------------------------|
|                                              | (n = 1308)                | (n = 2159)                 | (n = 4591)                   |
| <b>Category range for all aortic surgery</b> | <b>0 to 31 operations</b> | <b>32 to 52 operations</b> | <b>53 or more operations</b> |
| Root / Ascending Aorta                       | 1211 (92.6)               | 1798 (83.3)                | 3839 (83.6)                  |
| Aortic Arch                                  | 75 (5.7)                  | 275 (12.7)                 | 412 (9.0)                    |
| Descending Aorta                             | 17 (1.3)                  | 58 (2.7)                   | 245 (5.3)                    |
| Thoracoabdominal Aorta                       | 5 (0.4)                   | 28 (1.3)                   | 95 (2.1)                     |
| <i>Half (median) of activity</i>             | Lower half activity       |                            | Upper half activity          |
|                                              | (n = 2254)                |                            | (n = 5804)                   |
| <b>Category range for all aortic surgery</b> | <b>0 to 38 operations</b> |                            | <b>39 or more operations</b> |
| Root / Ascending aorta                       | 1964 (87.1)               |                            | 4884 (84.2)                  |
| Aortic Arch                                  | 214 (9.5)                 |                            | 548 (9.4)                    |
| Descending Thoracic Aorta                    | 44 (2.0)                  |                            | 276 (4.8)                    |
| Thoracoabdominal Aorta                       | 32 (1.4)                  |                            | 96 (1.7)                     |

Abbreviations: NACSA, National Adult Cardiac Surgery Audit.

\*Data are expressed in absolute numbers (percentage).

**Tables S10. Unadjusted and adjusted in-hospital mortality rates by aortic procedure and hospital volume (NACSA cohort)\***

|                                | Low volume | Medium volume      | High volume        |
|--------------------------------|------------|--------------------|--------------------|
| <b>Root / Ascending Aorta</b>  |            |                    |                    |
| Observed mortality rate (%)    | 10.7       | 8.3                | 7.4                |
| Unadjusted odds ratio (95% CI) | Reference  | 0.76 (0.60, 0.96)  | 0.67 (0.54, 0.83)  |
| Adjusted odds ratio (95% CI)   | Reference  | 0.75 (0.57, 0.98)  | 0.65 (0.51, 0.83)  |
| <b>Aortic Arch</b>             |            |                    |                    |
| Observed mortality rate (%)    | 13.1       | 13.2               | 13.4               |
| Unadjusted odds ratio (95% CI) | Reference  | 1.01 (0.52, 1.97)  | 1.02 (0.54, 1.93)  |
| Adjusted odds ratio (95% CI)   | Reference  | 1.28 (0.61, 2.65)  | 1.27 (0.63, 2.55)  |
| <b>Descending Aorta</b>        |            |                    |                    |
| Observed mortality rate(%)     | 20.0       | 28.1               | 11.8               |
| Unadjusted odds ratio (95% CI) | Reference  | 1.56 (0.50, 4.87)  | 0.53 (0.19, 1.53)  |
| Adjusted odds ratio (95% CI)   | Reference  | 2.36 (0.64, 8.76)  | 0.75 (0.23, 2.48)  |
| <b>Thoracoabdominal Aorta</b>  |            |                    |                    |
| Observed mortality rate (%)    | 14.3       | 28.6               | 22.6               |
| Unadjusted odds ratio (95% CI) | Reference  | 2.40 (0.41, 14.11) | 1.75 (0.36, 8.44)  |
| Adjusted odds ratio (95% CI)   | Reference  | 2.28 (0.35, 14.65) | 2.19 (0.42, 11.50) |

Abbreviations: CI, confidence interval; NACSA, National Adult Cardiac Surgery Audit.

\*Hospital volume was calculated by mean of the last 3 year annual activity and subdivided for tertiles of activity.

**Table S11. Characteristics of the studies included in the systematic review**

| Study (Author, Year)              | Design                                  | Country (Source)*          | Sample size | Study period | Inclusion criteria                                         | Exclusion criteria                    | Outcomes                                                                                                                                                                                                                                                                                                                   | Aortic centre configuration | Hospital Volume Threshold (cases/yr) |
|-----------------------------------|-----------------------------------------|----------------------------|-------------|--------------|------------------------------------------------------------|---------------------------------------|----------------------------------------------------------------------------------------------------------------------------------------------------------------------------------------------------------------------------------------------------------------------------------------------------------------------------|-----------------------------|--------------------------------------|
| Shaffer et al, <sup>12</sup> 2015 | Retrospective cohort study, Multicenter | USA (MEDPAR)               | 5578        | 1999-2010    | Open descending thoracic aorta and thoracoabdominal repair |                                       | Postoperative survival                                                                                                                                                                                                                                                                                                     | No                          | LV:<50†<br>MV: 50-200<br>HV:>200     |
| Shaffer et al, <sup>13</sup> 2015 | Retrospective cohort study, Multicenter | USA (MEDPAR)               | 11996       | 2005-2010    | TEVAR                                                      |                                       | Postoperative survival                                                                                                                                                                                                                                                                                                     | No                          | LV:<20†<br>MV: 20-99<br>HV:≥100      |
| Bhatt et al, <sup>14</sup> 2015   | Retrospective cohort study, Multicenter | USA (NIS)                  | 105         | 2000-2011    | TEVAR in adult aortic coarctation                          |                                       | Vascular complications (vascular injury, hemorrhage requiring transfusion, aortic dissection, arteriovenous fistula, accidental puncture, other vascular complications), any cardiac complications, open vascular/cardiac surgery, stroke/TIA, any respiratory complications, PE/DVT, anaesthetic complications, infection | NO                          | LV:<3<br>HV:≥3                       |
| Brat et al, <sup>15</sup> 2015    | Retrospective cohort study, Monocenter  | Czech Republic (Inst.Dat.) | 30          | 1999-2013    | Elective aortic arch aneurysm                              | Acute operation and aortic dissection | 30-day/in-hospital mortality, postop complications (permanent/transient neurological deficit,                                                                                                                                                                                                                              | No                          | NA                                   |



|                                       |                                           |                     |      |           |                                                |                                                 |                                                                                                                                                                                                                     |     |                                |
|---------------------------------------|-------------------------------------------|---------------------|------|-----------|------------------------------------------------|-------------------------------------------------|---------------------------------------------------------------------------------------------------------------------------------------------------------------------------------------------------------------------|-----|--------------------------------|
|                                       |                                           |                     |      |           |                                                |                                                 | haemodialysis, reoperation for bleeding, postoperative blood loss, intubation), LOS                                                                                                                                 |     |                                |
| Grau et al, <sup>16</sup><br>2015     | Retrospective case controlled, Monocenter | USA (Inst.Dat.)     | 54   | 2002-2013 | Acute type A aortic dissection                 |                                                 | In-hospital mortality, postop complications (cardiac arrest, stroke, ARF, reoperation for bleeding, AF, prolonged intubation), LOS,                                                                                 | Yes | NA                             |
| Lenos et al, <sup>17</sup><br>2015    | Retrospective cohort study, Monocenter    | Germany (Inst.Dat.) | 162  | 2002-2013 | Acute type A aortic dissection                 |                                                 | 30-day/in-hospital mortality, 90-day mortality, new permanent neurological deficit, adverse outcome                                                                                                                 | No  | NA                             |
| Iribarne et al, <sup>18</sup><br>2015 | Retrospective cohort study, Multicenter   | USA (NIS)           | 1230 | 2005-2008 | Acute aortic dissection                        | Non-emergent pts, pts<18 yr, TEVAR              | In-hospital mortality, postop complications (AMI, stroke, ARF, pneumonia, septicaemia), LOS, discharge disposition, hospitalization costs                                                                           | No  | LV: ≤ 5<br>MV: 6-10<br>HV: >10 |
| Murzi et al, <sup>19</sup><br>2015    | Retrospective cohort study, Monocenter    | Italy (Inst.Dat.)   | 867  | 2003-2013 | Aortic root, ascending and aortic arch surgery | Descending and thoraco-abdominal aortic surgery | In-hospital mortality, postop complications (AMI, stroke, ARF, reoperation for bleeding, pneumonia, pulmonary complications, delirium, postop aortic dissection, postop AF, renal dysfunction, infective, AV block, | No  | NA                             |

|                                       |                                           |                    |      |           |                                       |                            |                                                                                                                                                                                                                                                                           |     |                      |
|---------------------------------------|-------------------------------------------|--------------------|------|-----------|---------------------------------------|----------------------------|---------------------------------------------------------------------------------------------------------------------------------------------------------------------------------------------------------------------------------------------------------------------------|-----|----------------------|
|                                       |                                           |                    |      |           |                                       |                            | septicaemia, myocardial infarction)                                                                                                                                                                                                                                       |     |                      |
| Andersen et al, <sup>20</sup><br>2014 | Retrospective case controlled, Monocenter | USA (Inst.Dat.)    | 128  | 1999-2011 | Acute type A aortic dissection        | Iatrogenic dissection      | 30-day/in-hospital mortality, 30 day/in-hospital postop complications (AMI, stroke, ARF, reoperation for bleeding, prolonged ventilation, delayed sternum closure, DSWI, new-onset dialysis, tracheostomy), surgeon-specific mortality rates, LOS, postoperative survival | Yes | NA                   |
| Sales et al, <sup>21</sup><br>2014    | Retrospective case controlled, Monocenter | Brazil (Inst.Dat.) | 332  | 2003-2010 | Thoracic aortic surgery, TAAA surgery |                            | In-hospital mortality, postop complications (AMI, stroke, ARF, reopening for bleeding, pneumonia, mediastinitis, AV block, arrhythmia, sepsis, myocardial ischemia, pleural effusion, low cardiac output), LOS                                                            | Yes | NA                   |
| Weiss et al, <sup>22</sup><br>2014    | Retrospective cohort study, Multicenter   | USA (OSHDP)        | 1188 | 1995-2010 | TAAA                                  | TAA, AAA, pts < 18 yr      | In-hospital mortality, postop complications (AMI, stroke, ARF, prolonged intubation, ARDS, infection, sepsis, paraplegia)                                                                                                                                                 | No  | LV: <9<br>HV: ≥9     |
| Patel et al, <sup>23</sup><br>2013    | Retrospective cohort study,               | USA (MEDPAR)       | 7071 | 2004-2007 | TAA-descending (intact)               | TAA ruptured, TAAA, aortic | 30-day mortality, postop complication                                                                                                                                                                                                                                     | No  | <i>Open surgery:</i> |

|                                       |                                         |                   |       |           |                         |                                                                                                                                     |                                                                                                                                                                                                               |    |                                                                                                                                                                           |
|---------------------------------------|-----------------------------------------|-------------------|-------|-----------|-------------------------|-------------------------------------------------------------------------------------------------------------------------------------|---------------------------------------------------------------------------------------------------------------------------------------------------------------------------------------------------------------|----|---------------------------------------------------------------------------------------------------------------------------------------------------------------------------|
|                                       | Multicenter                             |                   |       |           |                         | dissection, ascending aortic aneurysm, concomitant cardiac procedures, use of cardioplegia, use of HCA                              | (ARF, reopening for bleeding, cardiac, infectious, pulmonary, graft), 1-/3-/5-year postoperative survival                                                                                                     |    | LV: ≤8<br>HV:>8<br><i>TEVAR</i> :<br>LV: ≤8<br>HV:>8                                                                                                                      |
| Arnaoutakis et al, <sup>24</sup> 2013 | Retrospective cohort study, Multicenter | USA (NIS)         | 1865  | 2005-2009 | TAAA (intact)           | Ruptured-traumatic-mycotic-syphilitic aneurysms, patients <18 yr or pts > 99 yr                                                     | In-hospital mortality, postop complications (cardiac, AMI, nervous, ARF, bleeding, paralysis, respiratory, digestive, visceral vascular, bowel resection, renal, seroma, wound, infectious), hospital charges | No | LV: 1<br>MV: 1-5<br>HV: 5-33                                                                                                                                              |
| Chikwe et al, <sup>25</sup> 2013      | Retrospective cohort study, Multicenter | USA (NIS)         | 5184  | 2003-2008 | Acute aortic dissection | Lack of surgeon identification                                                                                                      | In-hospital mortality‡                                                                                                                                                                                        | No | Lowest:<3<br>Low:>3-8<br>High:>8-13<br>Highest:>13                                                                                                                        |
| Goodney et al, <sup>26</sup> 2013     | Retrospective cohort study, Multicenter | USA (MP/Sf & MDf) | 15305 | 1998-2007 | TAA-Descending          | Aortic dissection, TAA ascending, TAAA, use of CPB with HCA, debranching procedures, procedures to extend endovascular landing zone | 30-day mortality, 1-year mortality and 5-year mortality                                                                                                                                                       | No | <i>Open surgery</i> :<br>Lowest: 1-4<br>LV: 5-8<br>MV: 9-15<br>HV: 16-46<br>Highest:>46<br><i>TEVAR</i> :<br>Lowest: 0-1<br>LV: 2-3<br>MV: 4-8<br>HV: 9-17<br>Highest:>18 |

|                                       |                                         |                     |       |           |                                |                                                                 |                                                                                                                                                                         |     |                                                                       |
|---------------------------------------|-----------------------------------------|---------------------|-------|-----------|--------------------------------|-----------------------------------------------------------------|-------------------------------------------------------------------------------------------------------------------------------------------------------------------------|-----|-----------------------------------------------------------------------|
| Soppa et al, <sup>27</sup><br>2013    | Retrospective cohort study, Monocenter  | UK (Inst.Dat.)      | 163   | 2005-2011 | Aortic root dilatation         | Marfan                                                          | In-hospital mortality, postop complications (stroke, temporary hemofiltration, reopening for bleeding), LOS, follow-up (late dilatation, late reoperations, late death) | Yes | NA                                                                    |
| Tsagakis et al, <sup>28</sup><br>2013 | Retrospective cohort study, Monocenter  | Germany (Inst.Dat.) | 124   | 2004-2011 | Acute type A aortic dissection | Pts died preoperatively                                         | 30-day mortality, postop complications (stroke, temporary hemofiltration, reopening for bleeding, malperfusion, laparotomy, peripheral surgery)                         | Yes | NA                                                                    |
| Hughes et al, <sup>29</sup><br>2013   | Retrospective cohort study, Multicenter | USA (STS)           | 13358 | 2004-2007 | TAA-ascending/<br>Aortic root  | Aortic dissection, non-elective cases                           | 30-day/in-hospital mortality, postop complications (stroke, ARF, reopening for bleeding, prolonged ventilation)                                                         | No  | Lowest:<6<br>Low: 6-13<br>MV:13-30<br>HV: 30-100                      |
| Sakata et al, <sup>30</sup><br>2012   | Retrospective cohort study, Multicenter | Japan (JATS)        | 14095 | 2005-2009 | Acute type A aortic dissection |                                                                 | 30-day mortality                                                                                                                                                        | No  | Lowest:1-4<br>Low: 5-9<br>MV: 10-14<br>High: 15-19<br>Highest:<br>≥20 |
| Chavanon et al, <sup>31</sup><br>2011 | Retrospective cohort study, Monocenter  | France (Inst.Dat.)  | 380   | 1990-2009 | Acute type A aortic dissection | Iatrogenic dissection, chronic dissection, recurrent dissection | In-hospital mortality                                                                                                                                                   | Yes | NA                                                                    |

|                                       |                                           |                 |     |           |                                                        |                                                                                                                                     |                                                                                                                                                                                                                                                                                   |     |                    |
|---------------------------------------|-------------------------------------------|-----------------|-----|-----------|--------------------------------------------------------|-------------------------------------------------------------------------------------------------------------------------------------|-----------------------------------------------------------------------------------------------------------------------------------------------------------------------------------------------------------------------------------------------------------------------------------|-----|--------------------|
| Gopaldas et al, <sup>32</sup><br>2010 | Retrospective cohort study, Multicenter   | USA (NIS)       | 923 | 2006-2008 | TAA-descending (ruptured)                              | Vasculitis, connective tissue disorders, aortic dissection, concomitant aneurysm, patients treated with both open surgery and TEVAR | In-hospital mortality, postop complications (hemopericardium, open cardiac massage, procedure-related complications, deep venous thrombosis, infections, mediastinitis, neurologic complications, pneumothorax, respiratory complications, renal complications, disposition), LOS | No  | LV\$<br>HV         |
| Harris et al, <sup>33</sup><br>2010   | Retrospective case controlled, Monocenter | USA (Inst.Dat.) | 101 | 2003-2009 | Acute aortic dissection                                | Iatrogenic dissection                                                                                                               | In-hospital mortality, time from presentation or diagnosis to OR                                                                                                                                                                                                                  | Yes | NA                 |
| Davies et al, <sup>34</sup><br>2010   | Retrospective case controlled, Monocenter | USA (Inst.Dat.) | 621 | 2007-2008 | Acute aortic dissection, symptomatic TAA and TAAA, AAA | IMH, aortic ulcers, chronic aneurysms and dissections                                                                               | In-hospital mortality, postop complications (AMI, ARF, respiratory failure, pulmonary embolisms, pneumonia, cardiovascular accident, spinal cord ischemia, arrhythmia, bowel ischemia, blood transfusion units [n], coagulopathy), LOS, time to therapy                           | Yes | NA                 |
| Gazoni et al, <sup>35</sup><br>2010   | Retrospective cohort study,               | USA (NIS)       | 731 | 2004-2007 | Elective TAA+TAAA                                      |                                                                                                                                     | 30-day/in-hospital mortality, postop                                                                                                                                                                                                                                              | No  | LV: ≤39<br>HV: ≥83 |

|                                        |                                         |                |       |           |                                                                                             |                                                                                                                              |                                                                                                                |    |                                                                    |
|----------------------------------------|-----------------------------------------|----------------|-------|-----------|---------------------------------------------------------------------------------------------|------------------------------------------------------------------------------------------------------------------------------|----------------------------------------------------------------------------------------------------------------|----|--------------------------------------------------------------------|
|                                        | Multicenter                             |                |       |           |                                                                                             |                                                                                                                              | complications (stroke, ARF, reopening for bleeding, prolonged ventilation, pneumonia), LOS, hospital discharge |    |                                                                    |
| Miyata et al, <sup>36</sup> 2009       | Retrospective cohort study, Multicenter | Japan (JACVSD) | 2875  | 2003-2005 | Thoracic aortic surgery including combined CABG, valve surgery or other surgical operations | Hospitals <5 procedures/yr, center with incomplete submission data                                                           | 30-day/in-hospital mortality                                                                                   | No | LV: 5-20¶<br>MV: 20-40<br>HV: >40                                  |
| Schermerhorn et al, <sup>37</sup> 2008 | Retrospective cohort study, Multicenter | USA (NIS)      | 2549  | 1988-2003 | TAA-descending                                                                              | TAAA, AA, use of cardioplegia, hypothermia, cardiac surgery debranching of epiaortic vessels, intrathoracic bypass, pts<18yr | In-hospital mortality, postop complications (cardiac, stroke, ARF, respiratory, neuro non-stroke), LOS         | No | LV: 1 [1,1]**<br>MV: 2 [2,3]<br>HV: 4 [3,25]                       |
| Knipp et al, <sup>38</sup> 2007        | Retrospective cohort study, Multicenter | USA (NIS)      | 3013  | 1995-2003 | Acute type A aortic dissection                                                              |                                                                                                                              | In-hospital mortality                                                                                          | No | LV: <1<br>MV: 1-2.5<br>HV: >2.5                                    |
| Kazui et al, <sup>39</sup> 2007        | Retrospective cohort study, Multicenter | Japan (JATS)   | 10097 | 2000-2004 | Acute type A aortic dissection                                                              |                                                                                                                              | 30-day mortality                                                                                               | No | Lowest:1-4<br>Low: 5-9<br>MV: 10-14<br>High: 15-19<br>Highest: ≥20 |
| Rigberg et al, <sup>40</sup> 2006      | Retrospective cohort study, Multicenter | USA (OSHDP)    | 1010  | 1991-2002 | TAAA                                                                                        | Aortic dissections                                                                                                           | 30-day mortality, 31-365 days mortality, 1-year mortality                                                      | No | LV: 1<br>MV: 2-7<br>MV: 7-14                                       |

|                                      |                                           |                 |                    |           |                                                                 |                                   |                                                                                                                                                                                                          |     |                                               |
|--------------------------------------|-------------------------------------------|-----------------|--------------------|-----------|-----------------------------------------------------------------|-----------------------------------|----------------------------------------------------------------------------------------------------------------------------------------------------------------------------------------------------------|-----|-----------------------------------------------|
| Narayan et al, <sup>41</sup><br>2004 | Retrospective cohort study, Monocenter    | UK (Inst.Dat.)  | 296                | 1992-2003 | Ascending and aortic arch (+ concomitant cardiac surgeries)     |                                   | 30-day/in-hospital mortality, postop complications (IABP, reopening for bleeding, rewiring, neurological complication [transient, permanent], renal complication), LOS, 1-/3-year postoperative survival | No  | NA                                            |
| Cowan et al, <sup>42</sup><br>2003   | Retrospective cohort study, Multicenter   | USA (NIS)       | 1542               | 1988-1998 | TAAA (intact)                                                   | TAAA ruptured, aortic dissections | In-hospital mortality, postop complications (cardiac, ARF, pulmonary, urinary tract, hemorrhage), LOS                                                                                                    | No  | LV: 1 [1,3]**<br>MV: 4 [2,9]<br>HV: 12 [5,31] |
| Derrow et al, <sup>43</sup><br>2001  | Retrospective cohort study, Multicenter   | USA (NIS)       | 2934 (TAAA, n=540) | 1993-1997 | TAAA (intact), renal artery bypass, chronic mesenteric ischemia | TAAA ruptured                     | In-hospital mortality, postop complications, LOS, discharge disposition, hospital charges                                                                                                                | No  | LV§<br>HV                                     |
| Albrink et al, <sup>44</sup><br>1994 | Retrospective case controlled, Monocenter | USA (Inst.Dat.) | 30                 | 1986-1990 | Blunt thoracic aortic transection                               |                                   | In-hospital mortality, postop complications (ARF, paraplegia, pneumonia/sepsis, paraparesia, recurrent laryngeal nerve injury, arrhythmia, chylothorax)                                                  | Yes | NA                                            |

Abbreviations: AAA, abdominal aortic aneurysm; AF, atrial fibrillation; AMI, acute myocardial infarction; ARDS, acute respiratory distress syndrome; ARF, acute renal failure; AV, atrio-ventricular; CPB, cardiopulmonary bypass; DSWI, deep sternal wound infection; DVT, deep venous thrombosis; HCA, hypothermic circulatory arrest; HV, high volume hospital; IABP, intra-aortic balloon pump; IMH, intramural hematoma; Inst.Dat., Institutional Database; LOS, length of stay; LV, low volume hospital; MV, medium volume hospital; NA, not available; OR, operating room; PE, pulmonary embolism; TAA, thoracic aorta aneurysm; TAAA, thoracoabdominal aneurysm; TEVAR, thoracic endovascular aortic repair.

\*Data source: JATS=Japanese Association for Thoracic Surgery. JACVSD=Japan Adult Cardiovascular Surgery Database. MEDPAR=Medicare Provider Analysis and Review. MP/Sf & MDf=Medicare Physician/Supplier file and Medicare Denominator file. NIS=Nationwide Inpatient Sample. OSHPD=California Office of Statewide Health Planning and Development. STS-ACSD=Society of Thoracic Surgeons Adult Cardiac Surgery Database. VCSQI=Virginia Cardiac Quality Initiative.

†Volume activity defined over the entire study period.

‡Major postoperative complications listed, but no comparison was made with reference to the hospital or surgeon volume or hospital location or teaching status.

§Not specified the threshold (cases/year); general definition of LV (vs MV) vs HV hospital only.

¶Low volume thoracic aortic center performing <5 case/yr excluded (n=2 hospitals).

\*\*Defined as median [range] of cases.



**Table S12. Study outcomes stratified by hospital and surgeon volume**

| Study<br>(Author, Year)                             | High-Volume<br>(HV) |               |      | Low-Volume<br>(LV) |               |      | Mortality (%) |       | Re-exploration<br>bleeding/<br>tamponade (%) |      | Stroke (%) |      | Acute renal<br>failure (%) |       | Perioperative<br>MI (%) |       | LOS (days)     |                 |
|-----------------------------------------------------|---------------------|---------------|------|--------------------|---------------|------|---------------|-------|----------------------------------------------|------|------------|------|----------------------------|-------|-------------------------|-------|----------------|-----------------|
|                                                     | Age<br>(yr)         | Female<br>(%) | Pts  | Age<br>(yr)        | Female<br>(%) | Pts  | HV            | LV    | HV                                           | LV   | HV         | LV   | HV                         | LV    | HV                      | LV    | HV             | LV              |
| <b>Hospital volume</b>                              |                     |               |      |                    |               |      |               |       |                                              |      |            |      |                            |       |                         |       |                |                 |
| Iribarne et al, <sup>18</sup><br>2015               | 58.7<br>(16.2)      | 33.1          | 124  | 59.5<br>(14.6)     | 32.6          | 798  | 12.1          | 23.4* |                                              |      | 9.7        | 9.5  | 20.2                       | 30.3* | 0.8                     | 5.5*  | 13.9<br>(11.7) | 14.9<br>(15.4)  |
| Weiss et al, <sup>22</sup><br>2014                  |                     | 49.2          | 479  |                    | 42.6          | 709  | 20.4          | 25.2  |                                              |      | 7.9        | 2.6* | 28.4                       | 22.4* | 12.5                    | 13.0* |                |                 |
| Patel et al, <sup>23</sup><br>2013<br>(open repair) | 72<br>(8.1)         | 49.0          | 1772 | 72<br>(8.1)        | 51.0          | 1782 | 11.0          | 15*   | 17.0                                         | 16.0 |            |      | 20.0                       | 17.0  |                         |       |                |                 |
| Patel et al, <sup>23</sup><br>2013<br>(TEVAR)       | 75<br>(7.9)         | 42.0          | 1758 | 75<br>(7.7)        | 43.0          | 1759 | 5.5           | 3.9   | 13.0                                         | 11.0 |            |      | 6.9                        | 5.3   |                         |       |                |                 |
| Chikwe et al, <sup>25</sup><br>2013                 |                     |               | 1379 |                    |               | 1312 | 16.4          | 27.4* |                                              |      |            |      |                            |       |                         |       |                |                 |
| Hughes et al, <sup>29</sup><br>2013                 | 59.9                | 29.2          | 3404 | 60.9               | 30.9          | 3331 | 3.4           | 5.8*  |                                              |      | 1.9        | 2.3  | 4.6                        | 5.7   |                         |       |                |                 |
| Sakata et al, <sup>30</sup><br>2012                 |                     |               | 2779 |                    |               | 3051 | 9.7           | 16.1* |                                              |      |            |      |                            |       |                         |       |                |                 |
| Gazoni et al, <sup>35</sup><br>2010                 | 62.5                |               | 515  | 61.0               |               | 216  | 3.7           | 8.3*  | 5.4                                          | 7.9  | 4.8        | 1.4* | 4.5                        | 8.3   |                         |       | 8.5<br>(10.1)  | 11.6<br>(17.0)* |
| Miyata et al, <sup>36</sup><br>2009                 | 69<br>(58-75)       | 30.9          | 1398 | 69<br>(61-75)      | 36.4          | 481  | 4.4           | 9.6*  |                                              |      |            |      |                            |       |                         |       |                |                 |
| Schermerhorn et<br>al, <sup>37</sup> 2008           | 68<br>(18-92)       | 42.2          | 1262 | 68<br>(21-89)      | 43.1          | 685  | 15.5          | 21.7* |                                              |      | 3.2        | 2.3  | 9.8                        | 10.8  |                         |       | 19<br>(1-330)  | 15<br>(15-176)* |
| Kazui et al, <sup>39</sup><br>2007                  |                     |               | 541  |                    |               | 3085 | 7.9           | 18.5* |                                              |      |            |      |                            |       |                         |       |                |                 |

|                                       |               |      |     |               |      |      |      |       |      |       |     |       |      |       |     |     |                |                |
|---------------------------------------|---------------|------|-----|---------------|------|------|------|-------|------|-------|-----|-------|------|-------|-----|-----|----------------|----------------|
| Cowan et al, <sup>42</sup><br>2003    | 68.3<br>(9.2) | 42.0 | 506 | 68.5<br>(9.9) | 40.0 | 569  | 15.0 | 27.3* | 10.3 | 14.8  |     |       | 13.0 | 12.3* |     |     |                |                |
| Derrow et al, <sup>43</sup><br>2001   | 69.5<br>(8.8) |      | 403 | 69.2<br>(5.9) |      | 17   | 18.2 | 25.0  |      |       |     |       |      |       |     |     | 19.3<br>(18.9) | 21.9<br>(20.1) |
| <b>Surgeon Volume</b>                 |               |      |     |               |      |      |      |       |      |       |     |       |      |       |     |     |                |                |
| Lenos et al, <sup>17</sup><br>2015    | 62<br>(15)    | 34.7 | 75  | 63<br>(14)    | 32.2 | 87   | 4.0  | 21.8* |      |       | 2.7 | 11.5* |      |       |     |     |                |                |
| Murzi et al, <sup>19</sup><br>2014    |               | 27.6 | 460 |               | 31.7 | 407  | 3.7  | 2.2   | 9.6  | 11.3  | 2.6 | 2.5   | 8.7  | 10.1  | 2.2 | 1.5 |                |                |
| Andersen et al, <sup>20</sup><br>2014 | 54<br>(14)    | 28.0 | 72  | 58<br>(15)    | 30.0 | 56   | 2.8  | 33.9* | 4.2  | 33.9* | 5.6 | 12.5  | 16.7 | 26.8  | 1.4 | 1.8 | 12 (12)        | 10 (12)        |
| Chikwe et al, <sup>25</sup><br>2013   |               |      | 938 |               |      | 1130 | 17.0 | 27.5* |      |       |     |       |      |       |     |     |                |                |
| Narayan et al, <sup>41</sup><br>2004  | 64<br>(52-72) | 29.2 | 130 | 60<br>(47-68) | 29.5 | 166  | 10.8 | 13.9  | 7.7  | 7.8   | 3.8 | 4.8   |      |       |     |     |                |                |
| Albrink at al, <sup>44</sup><br>1994  | 36.1          | 13.0 | 15  | 35.9          | 17.0 | 12   | 7.0  | 50*   |      |       |     |       | 6.7  | 41.7* |     |     |                |                |

Abbreviations: LV, low volume; LOS, length of hospital stay; HV, high volume; SD, standard deviation; TEVAR, thoracic endovascular aortic repair.

Values are expressed as mean ( $\pm$ SD) or median (with interquartile range or normal range) for numerical variables, and percentage for categorical variables

\*P-value <0.05 for comparison between LV *versus* HV hospital/surgeon.

**Table S13. Study outcomes for study with defined a specific thoracic aortic program**

| Study<br>(Author, Year)               | Post-Thoracic Program |          |     | Pre-Thoracic Program |          |     | Mortality (%) |       | Re-exploration bleeding/<br>tamponade (%) |       | Stroke (%) |       | Acute renal failure (%) |       | Myocardial infarction (%) |     | LOS (days)     |                |
|---------------------------------------|-----------------------|----------|-----|----------------------|----------|-----|---------------|-------|-------------------------------------------|-------|------------|-------|-------------------------|-------|---------------------------|-----|----------------|----------------|
|                                       | Age                   | Female % | Pts | Age                  | Female % | Pts | Post          | Pre   | Post                                      | Pre   | Post       | Pre   | Post                    | Pre   | Post                      | Pre | Post           | Pre            |
| Grau et al, <sup>16</sup><br>2015     | 62 (12)               | 22.7     | 38  | 63 (12)              | 50*      | 16  | 7.9           | 12.5  | 21.2                                      | 6.3   | 2.6        | 6.3   | 7.9                     | 6.3   |                           |     | 8.2<br>(6)     | 13.5<br>(11)*  |
| Andersen et al, <sup>20</sup><br>2014 | 54 (14)               | 28.0     | 72  | 58 (15)              | 30.0     | 56  | 2.8           | 33.9* | 4.2                                       | 19.6* | 5.6        | 12.5  | 16.7                    | 26.8  | 1.4                       | 1.8 | 12<br>(12)     | 10<br>(12)     |
| Sales et al, <sup>21</sup><br>2014    | 60 (15)               | 49.0     | 175 | 56 (13)*             | 51.0     | 157 | 9.7           | 23*   | 14.3                                      | 20.4  | 4.6        | 10.9* | 2.3                     | 1.9   | 1.7                       | 1.9 | 14.8<br>(14.2) | 14.4<br>(12.8) |
| Davies et al, <sup>34</sup><br>2010   | 69 (12)               | 28.0     | 173 | 70 (13)              | 23.0     | 133 | 6.0           | 4.0   |                                           |       | 9          | 7     | 21                      | 14    | 2                         | 2   | 10<br>(6)      | 11<br>(8)      |
| Harris et al, <sup>33</sup><br>2010   | 64 (17)               | 48.0     | 71  | 64 (18)              | 27.0     | 30  | 26.8          | 33.3  |                                           |       |            |       |                         |       |                           |     |                |                |
| Albrink et al, <sup>44</sup><br>1994  | 36.1                  | 13.0     | 15  | 35.9                 | 17.0     | 12  | 7.0           | 50*   |                                           |       |            |       | 6.7                     | 41.7* |                           |     |                |                |

Abbreviations: LOS, length of hospital stay; SD, standard deviation.

Values are expressed as mean ( $\pm$ SD) for the numerical variables, and percentage for the categorical variables.

\*P-value <0.05 for comparison between pre-thoracic and post-thoracic program introduction.

**Table S14. Quality assessment of observational studies according to the Newcastle-Ottawa Scale**

| <b>Study*<br/>(Author, Year)</b>       | <b>Selection</b> | <b>Comparability</b> | <b>Outcome</b> | <b>Exposure</b> | <b>Total</b> |
|----------------------------------------|------------------|----------------------|----------------|-----------------|--------------|
| <b>Cohort Studies</b>                  |                  |                      |                |                 |              |
| Schaffer et al, <sup>12</sup> 2015     | 4                | 2                    | 3              | -               | 9            |
| Schaffer et al, <sup>13</sup> 2015     | 4                | 2                    | 3              | -               | 9            |
| Bhatt et al, <sup>14</sup> 2015        | 4                | 2                    | 3              | -               | 9            |
| Brat et al, <sup>15</sup> 2015         | 2                | 1                    | 1              | -               | 4            |
| Lenos et al, <sup>17</sup> 2015        | 3                | 2                    | 2              | -               | 7            |
| Iribarne et al, <sup>18</sup> 2015     | 4                | 2                    | 2              | -               | 8            |
| Murzi et al, <sup>19</sup> 2014        | 4                | 0                    | 1              | -               | 5            |
| Weiss et al, <sup>22</sup> 2014        | 4                | 0                    | 2              | -               | 6            |
| Patel et al, <sup>23</sup> 2013        | 4                | 2                    | 2              | -               | 8            |
| Arnaoutakis et al, <sup>24</sup> 2013  | 4                | 1                    | 2              | -               | 7            |
| Chikwe et al, <sup>25</sup> 2013       | 4                | 1                    | 2              | -               | 7            |
| Goodney et al, <sup>26</sup> 2013      | 4                | 2                    | 2              | -               | 8            |
| Soppa et al, <sup>27</sup> 2013        | 4                | 2                    | 3              | -               | 9            |
| Tsagakis et al, <sup>28</sup> 2013     | 3                | 0                    | 1              | -               | 4            |
| Hughes et al, <sup>29</sup> 2013       | 4                | 2                    | 2              | -               | 8            |
| Sakata et al, <sup>30</sup> 2012       | 4                | 1                    | 2              | -               | 7            |
| Chavanon et al, <sup>31</sup> 2011     | 3                | 0                    | 2              | -               | 6            |
| Gopaldas et al, <sup>32</sup> 2010     | 4                | 2                    | 2              | -               | 8            |
| Gazoni et al, <sup>35</sup> 2010       | 4                | 2                    | 2              | -               | 8            |
| Miyata et al, <sup>36</sup> 2009       | 4                | 1                    | 2              | -               | 7            |
| Schermerhorn et al, <sup>37</sup> 2008 | 4                | 2                    | 2              | -               | 8            |
| Knipp et al, <sup>38</sup> 2007        | 4                | 1                    | 2              | -               | 7            |
| Kazui et al, <sup>39</sup> 2007        | 4                | 1                    | 2              | -               | 7            |
| Rigberg et al, <sup>40</sup> 2006      | 4                | 2                    | 3              | -               | 9            |
| Narayan et al, <sup>41</sup> 2004      | 3                | 2                    | 2              | -               | 7            |
| Cowan et al, <sup>42</sup> 2003        | 4                | 2                    | 3              | -               | 9            |
| Derrow et al, <sup>43</sup> 2001       | 4                | 0                    | 2              | -               | 6            |
| <i>Mean score</i>                      | <i>3.8</i>       | <i>1.4</i>           | <i>2.1</i>     | <i>-</i>        | <i>7.3</i>   |
| <b>Case Controlled Studies</b>         |                  |                      |                |                 |              |
| Grau et al, <sup>16</sup> 2015         | 2                | 2                    | -              | 3               | 7            |
| Andersen et al, <sup>20</sup> 2014     | 2                | 2                    | -              | 3               | 7            |
| Sales et al, <sup>21</sup> 2014        | 2                | 0                    | -              | 2               | 4            |
| Harris et al, <sup>33</sup> 2010       | 2                | 2                    | -              | 3               | 7            |
| Davies et al, <sup>34</sup> 2010       | 2                | 2                    | -              | 3               | 7            |
| Albrink et al, <sup>44</sup> 1994      | 1                | 1                    | -              | 1               | 3            |
| <i>Mean score</i>                      | <i>1.8</i>       | <i>1.5</i>           | <i>-</i>       | <i>2.5</i>      | <i>5.8</i>   |

\*A study can be awarded a maximum of 4 points for the Selection category, 2 points for the comparability category and 3 points for the Outcome/Exposure categories. Therefore the maximum points a study can obtain is 9 which indicates a high quality study.

**Table S15. List of variables included in the final multivariable model**

| <b>Study*<br/>(Author, Year)</b>      | <b>Adjustement perorfemed</b>                                                                                                                                                                                                                                                | <b>Variables included in the final model</b>                                                                                                                                                                                                                                                                                                                                                                                                                                                                                                                                                                                                                          | <b>Reference</b>    | <b>Adjusted OR (95% CI)</b> |
|---------------------------------------|------------------------------------------------------------------------------------------------------------------------------------------------------------------------------------------------------------------------------------------------------------------------------|-----------------------------------------------------------------------------------------------------------------------------------------------------------------------------------------------------------------------------------------------------------------------------------------------------------------------------------------------------------------------------------------------------------------------------------------------------------------------------------------------------------------------------------------------------------------------------------------------------------------------------------------------------------------------|---------------------|-----------------------------|
| Iribarne et al, <sup>18</sup><br>2015 | Binary logistic regression                                                                                                                                                                                                                                                   | Charlson comorbidity score*                                                                                                                                                                                                                                                                                                                                                                                                                                                                                                                                                                                                                                           | LV                  | 0.47 (0.27 to 0.82)         |
| Weiss et al, <sup>22</sup><br>2014    | Binary logistic regression                                                                                                                                                                                                                                                   | Age, sex, race, admission year, Charlson comorbidity index*, aneurysm rupture, elective repair, HV centers with ≥ 9 cases per year                                                                                                                                                                                                                                                                                                                                                                                                                                                                                                                                    | LV                  | 0.40 (0.17 to 0.96)         |
| Hughes et al, <sup>29</sup><br>2013   | Binary logistic regression                                                                                                                                                                                                                                                   | Age, LVEF, BSA, serum creatinine, time trend, active endocarditis, need for dialysis, atrial fibrillation, female gender, hypertension, immunosuppressive treatment, presence of an IABP, inotrope use, peripheral vascular disease, unstable angina (no myocardial infarction < 7 days), left main disease, aortic stenosis, aortic insufficiency, mitral stenosis, mitral insufficiency, tricuspid insufficiency, chronic lung disease, cerebrovascular disease or cerebrovascular accident, diabetes, number of diseased coronary vessels, MI, race, admission status, congestive heart failure, NYHA class, reoperation, and concomitant CABG                     | LV                  | 0.42 (0.31 to 0.58)         |
| Chikwe et al, <sup>25</sup><br>2013   | Binary logistic regression<br>(4 distinct model including:<br>i) annual thoracic aortic dissection surgeon volume;<br>ii) annual thoracic aortic dissection institution volume;<br>iii) annual total cardiac surgeon volume;<br>iv) annual total cardiac institution volume) | Age, sex, race, payer status, anemia, coagulopathy, congestive heart failure, chronic pulmonary disease, obesity, renal failure, cerebrovascular disease, hypertension, peripheral vascular disease, valve disorders, diabetes, ischemic heart disease, previous cardiac surgery, concomitant CABG, smoking history, hospital location, hospital bed size, and teaching status, annual thoracic annual thoracic aortic dissection surgeon volume, the second model included annual thoracic aortic dissection institution volume, the third model included annual total cardiac surgeon volume, and the fourth model included annual total cardiac institution volume | HV                  | 2.21 (1.72 to 2.86)         |
| Patel et al, <sup>23</sup><br>2013    | Binary logistic regression                                                                                                                                                                                                                                                   | n/a                                                                                                                                                                                                                                                                                                                                                                                                                                                                                                                                                                                                                                                                   | HV<br>(open repair) | 1.4 (1.1 to 1.8)            |
| Gazoni et al, <sup>35</sup><br>2010   | Binary logistic regression                                                                                                                                                                                                                                                   | n/a                                                                                                                                                                                                                                                                                                                                                                                                                                                                                                                                                                                                                                                                   | LV                  | 0.41 (0.18 to 0.92)         |

|                                          |                                                           |                                                                                                                                                                                                                                                                                                     |    |                  |
|------------------------------------------|-----------------------------------------------------------|-----------------------------------------------------------------------------------------------------------------------------------------------------------------------------------------------------------------------------------------------------------------------------------------------------|----|------------------|
| Miyata et al, <sup>36</sup><br>2009      | Hierarchical mixed-effects logistic regression model      | clinical risk factors, procedure year, clinical events (beta-blocker usage), range of replacement (root, ascending, arch, distal aorta, descending, thoracoabdominal, abdominal) hospital procedural volume, and surgeon volume were set as fixed effects, and sites were used as random intercepts | LV | 0.989            |
| Shermerhorn et al, <sup>37</sup><br>2008 | Binary logistic regression with and without comorbidities | Comorbidities                                                                                                                                                                                                                                                                                       | HV | 1.3 (1.1 to 1.6) |
| Cowan et al, <sup>42</sup><br>2003       | Binary logistic regression                                | n/a                                                                                                                                                                                                                                                                                                 | HV | 2.2 (1.6 to 3.1) |

Abbreviations: BSA, body surface area; CABG, coronary artery bypass grafting; CI, confidence interval; HV, high volume; IABP, intra-aortic balloon pump; LV, low volume; n/a, not available; NYHA, New York Heart Association; OR, Odds ratio.

\*List of variables defined in Charlson ME, Pompei P, Ales KL, MacKenzie CR. A new method of classifying prognostic comorbidity in longitudinal studies: development and validation. *J Chron Dis* 1987;40:373-83.

Supplemental Figures

Figure S1. Adjusted six-month mortality in patients affected by TAD receiving an operation (treated) and in those who did not (untreated) by county (HES cohort)

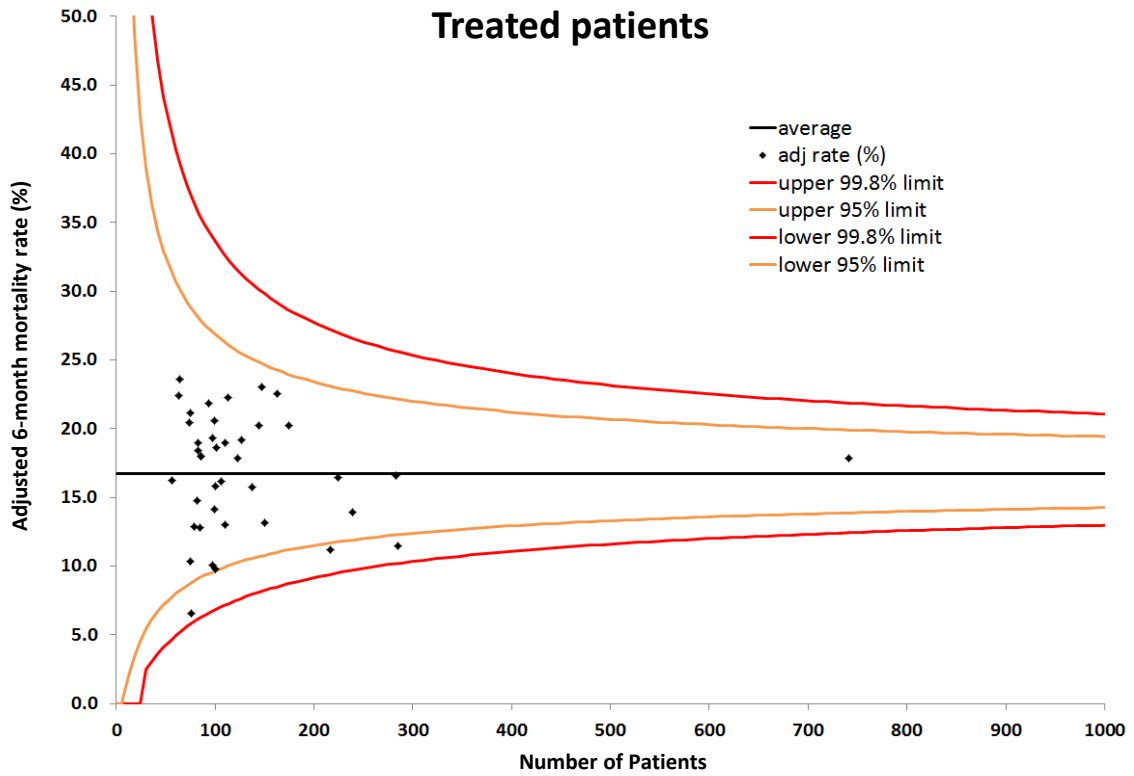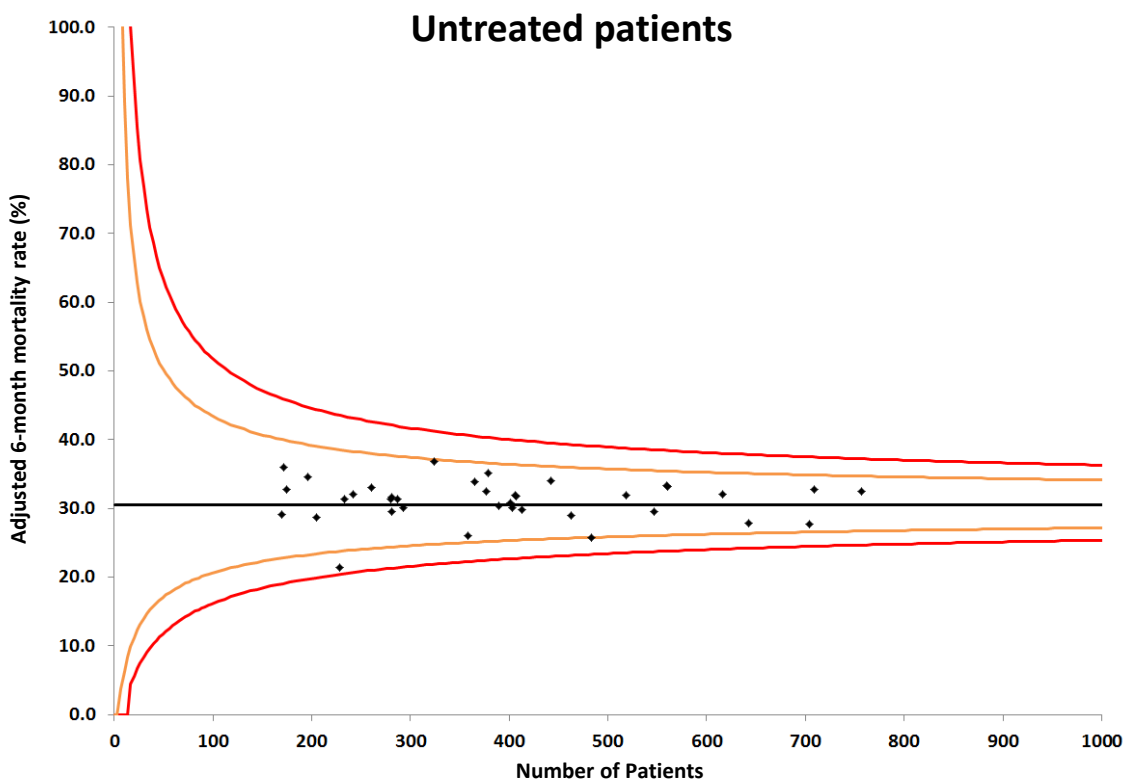

Abbreviations: adj, adjusted; TAD, thoracic aortic disease.

Figure S2. Centre activity by the most distal aortic segment (NACSA dataset)

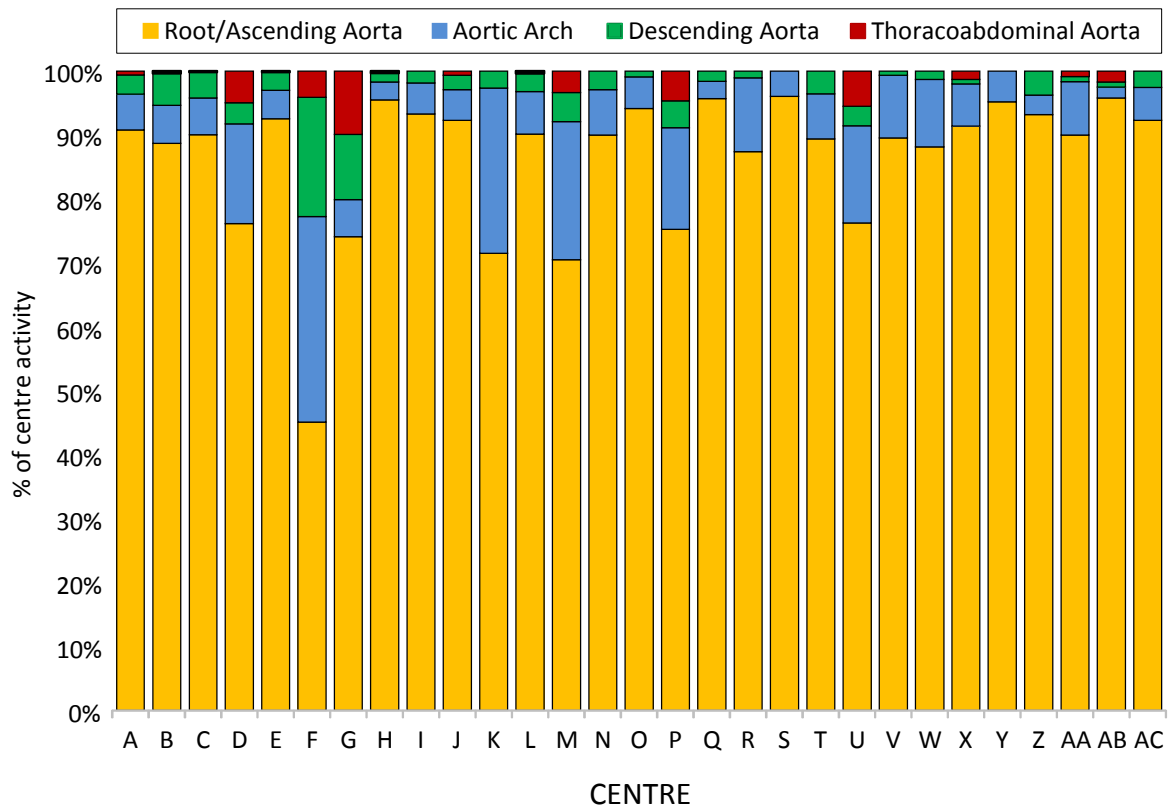



Figure S3. Correlation between the hospital activity (number of cases) and in-hospital mortality (NACSA dataset)

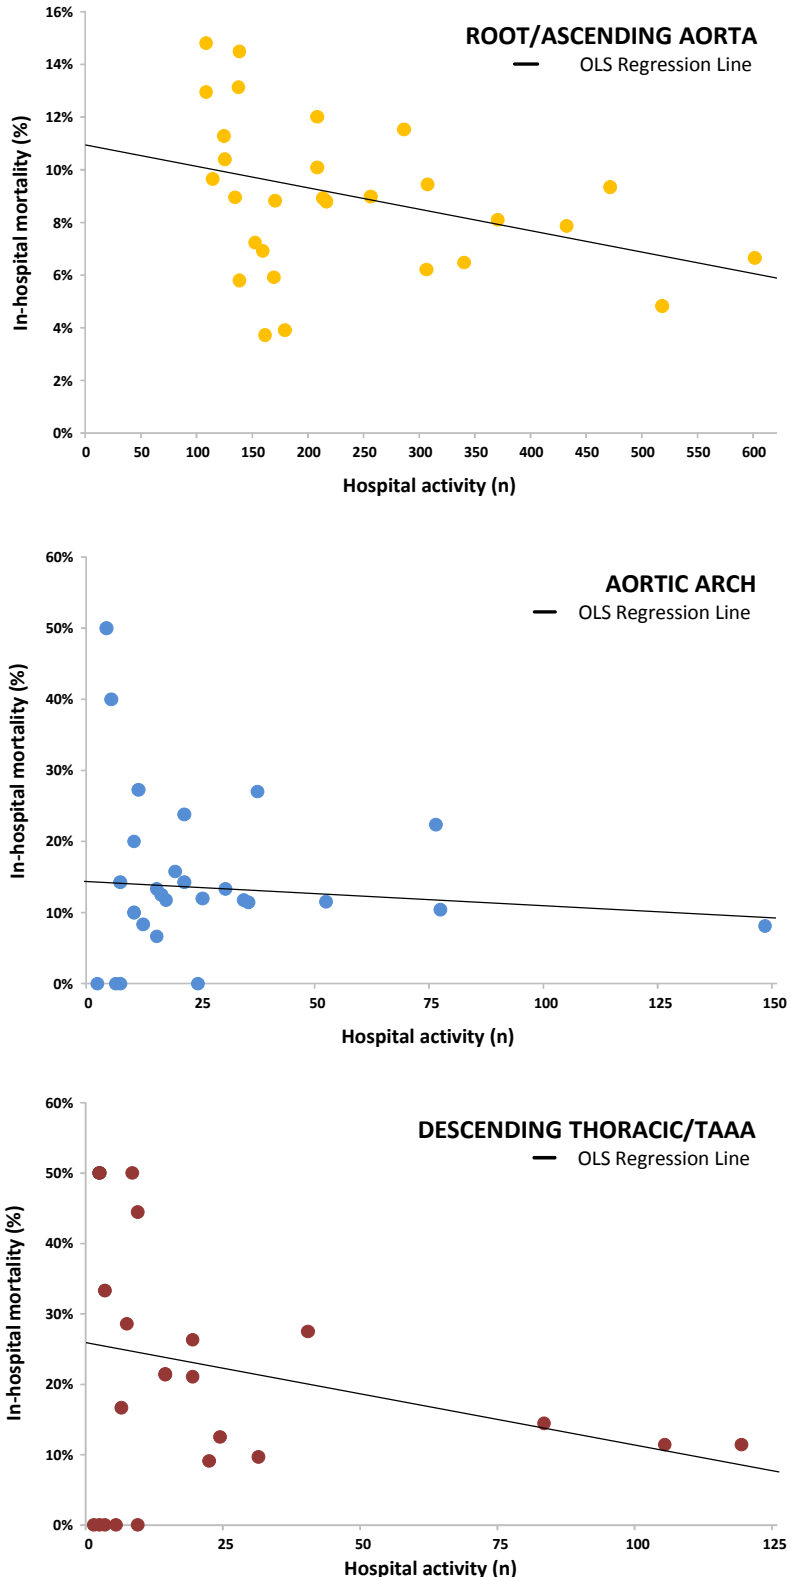

For the regression line in the root and ascending category,  $r^2=0.13$ , in the aortic arch category  $r^2=0.01$ . Because of the small number in each sub-groups, and for the purposes of the present analysis descending thoracic and thoracoabdominal procedures were grouped together, leaving a  $r^2$  value of 0.07. In all of the categories, the OLS regression lines indicate that a trend towards decreasing mortality was observed in centres with HV activity. Abbreviations: HV, high volume (centre); OLS=ordinary least squares.

Figure S4. PRISMA flow chart of search strategy<sup>11</sup>

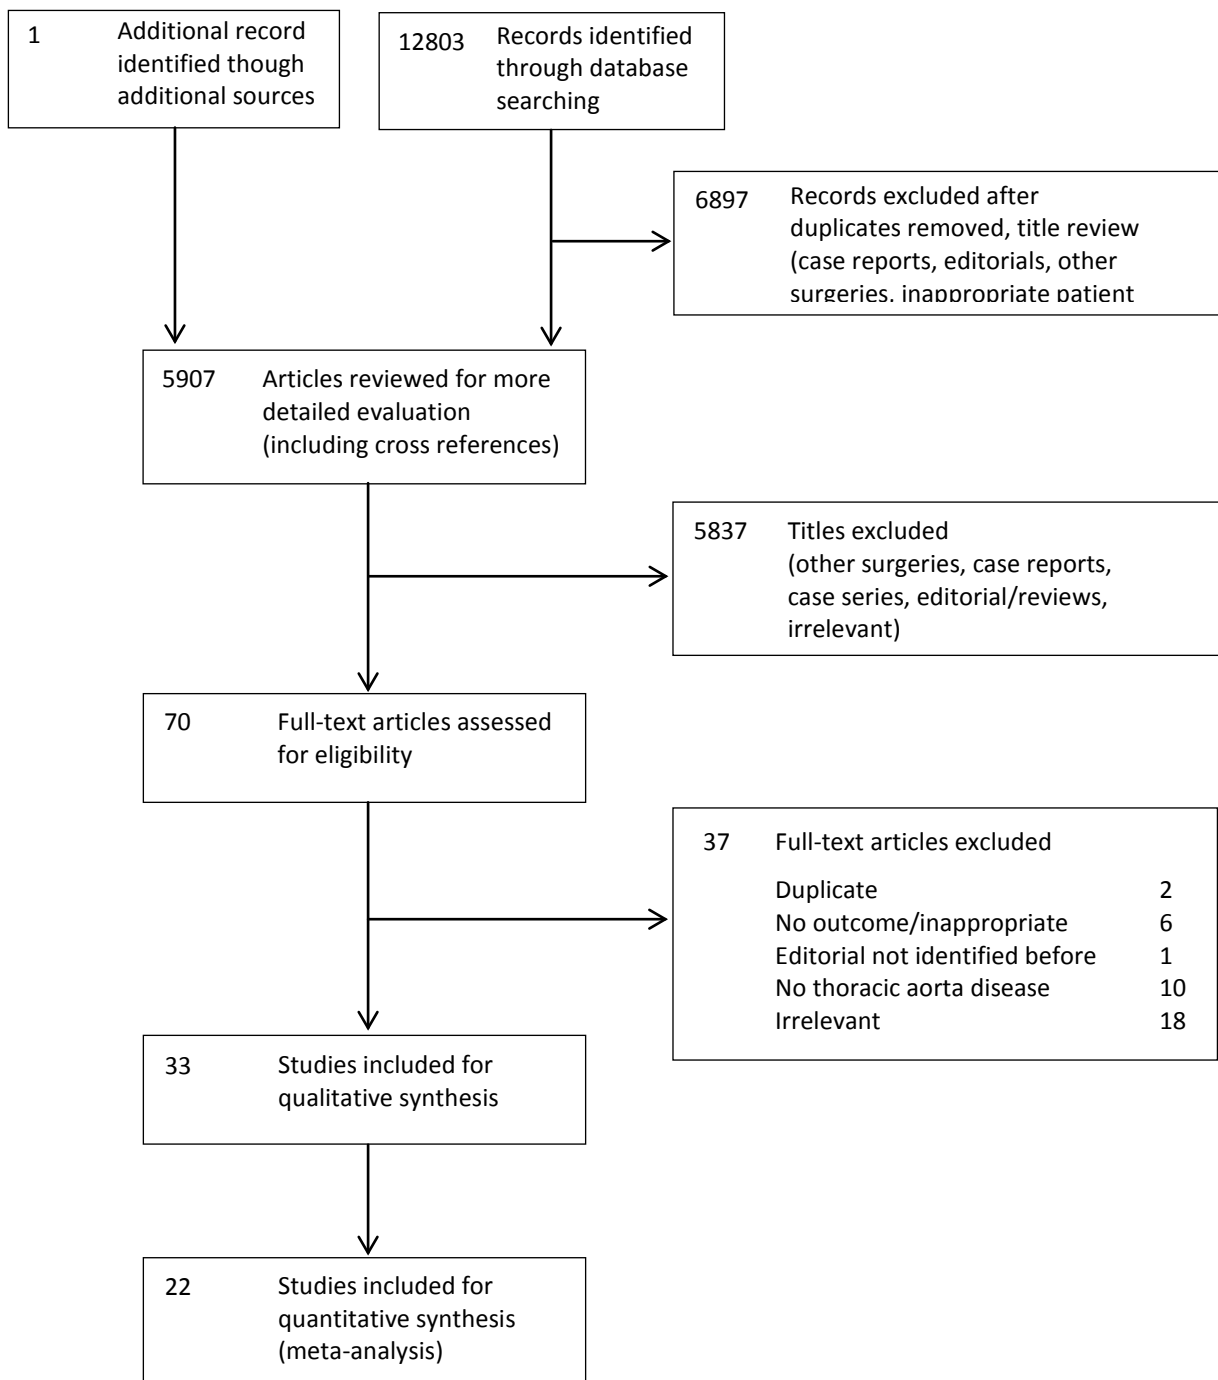

Figure S5. Funnel plots showing the absence of publication bias

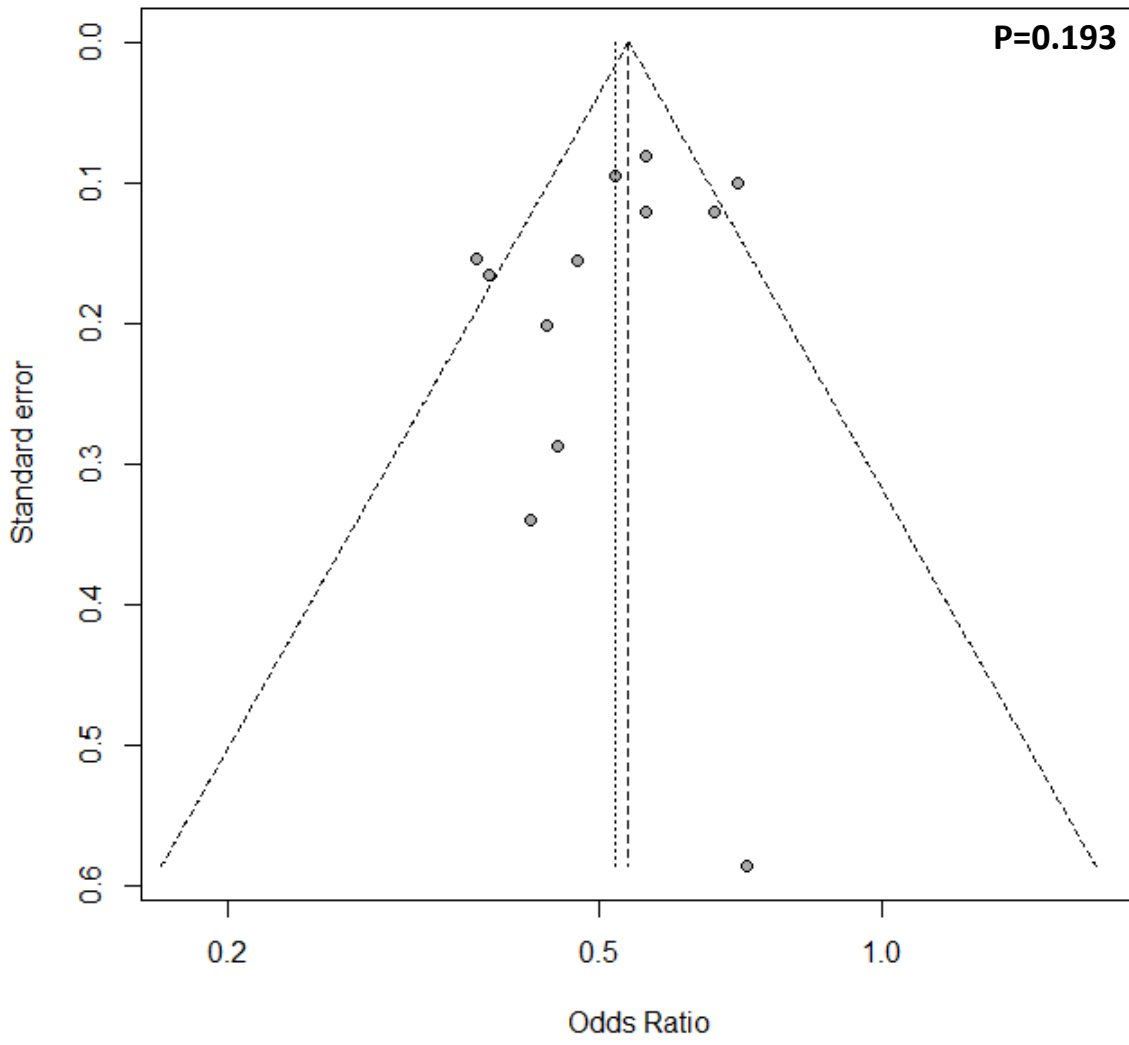

Figure S6. Forest plot for high-volume *versus* low-volume hospitals on operative mortality according to the primary aortic pathology (upper panel), and forest plot reporting risk adjusted estimates for high- *versus* low-volume hospitals on operative mortality according to the primary aortic pathology (lower panel)

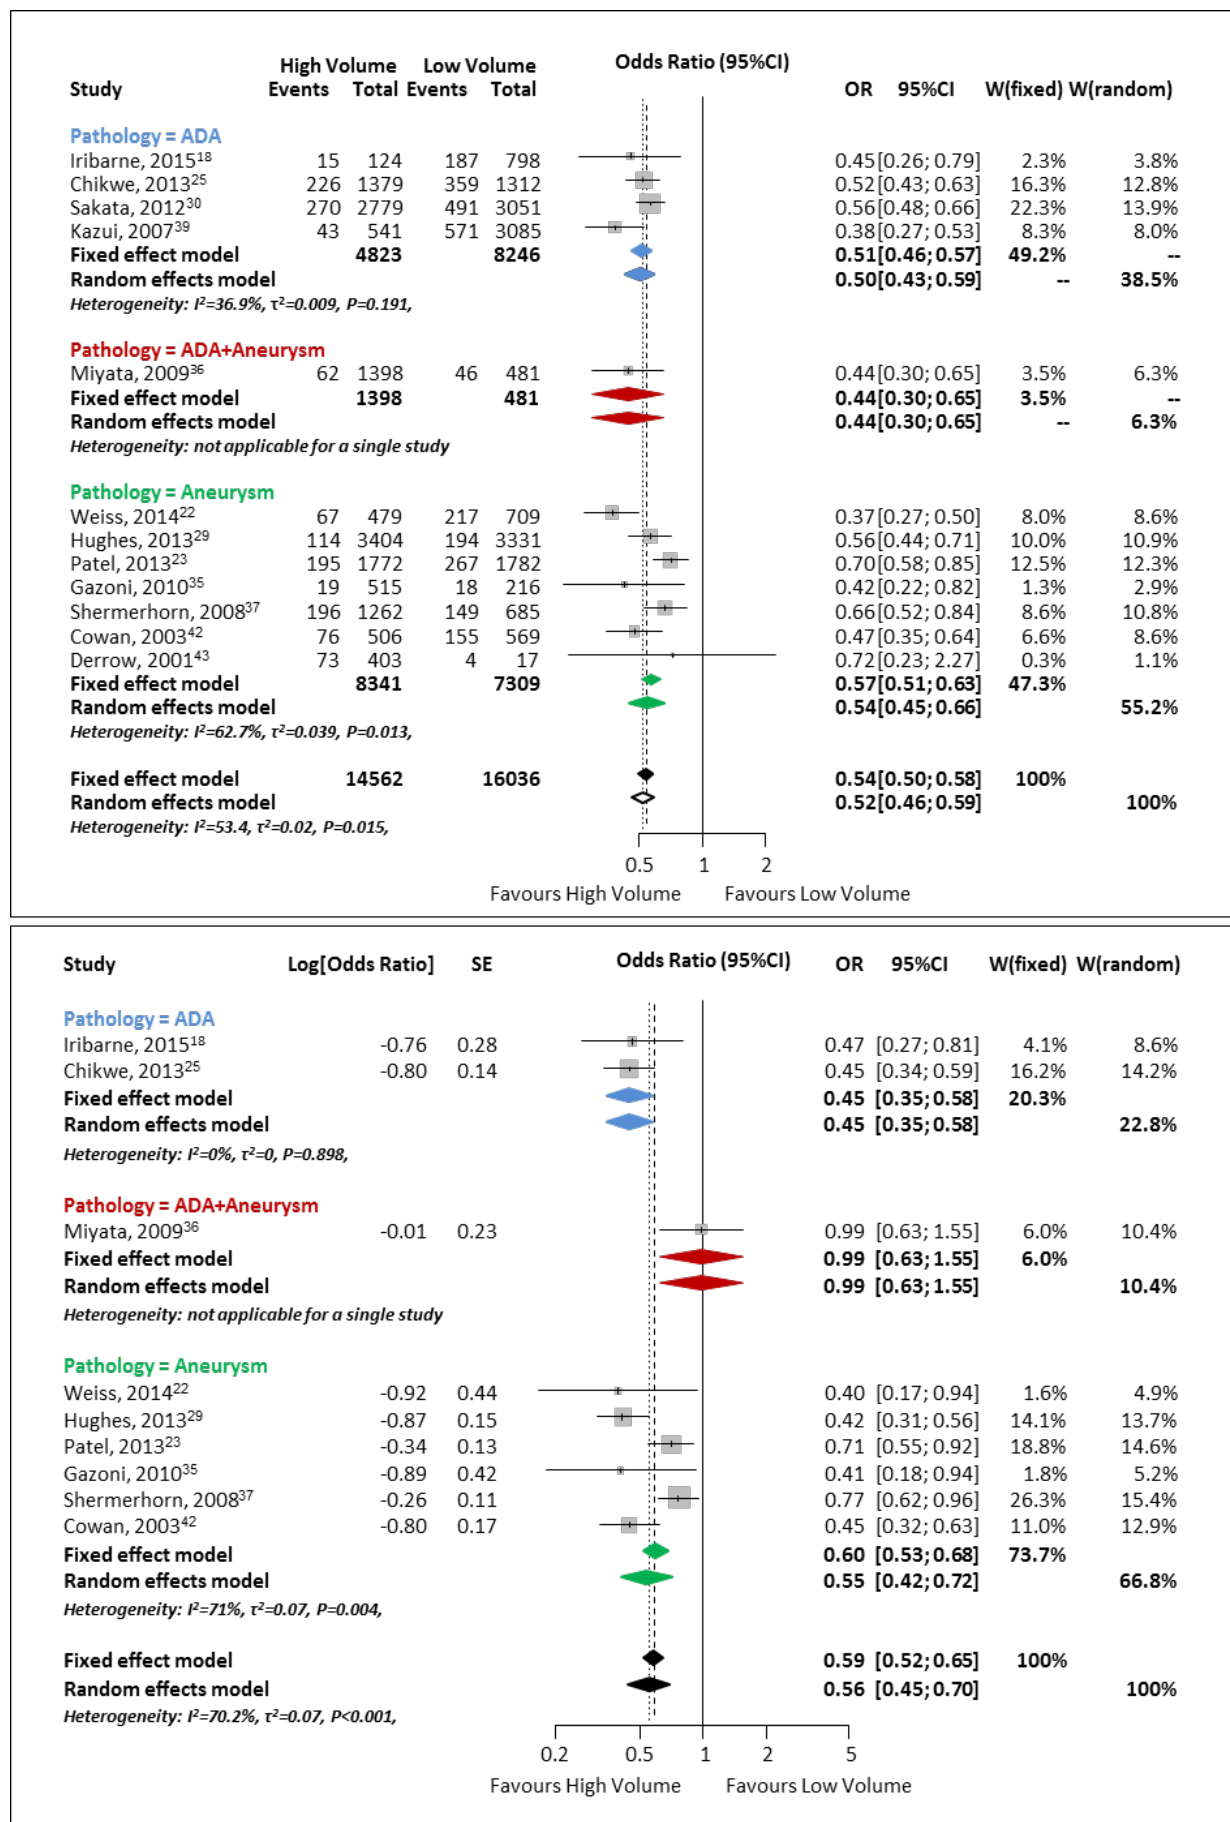

Abbreviations: ADA, acute aortic dissection; CI, confidence interval; OR, odds ratio.

Figure S7. Forest plots comparing the effect of hospital volume for secondary outcomes

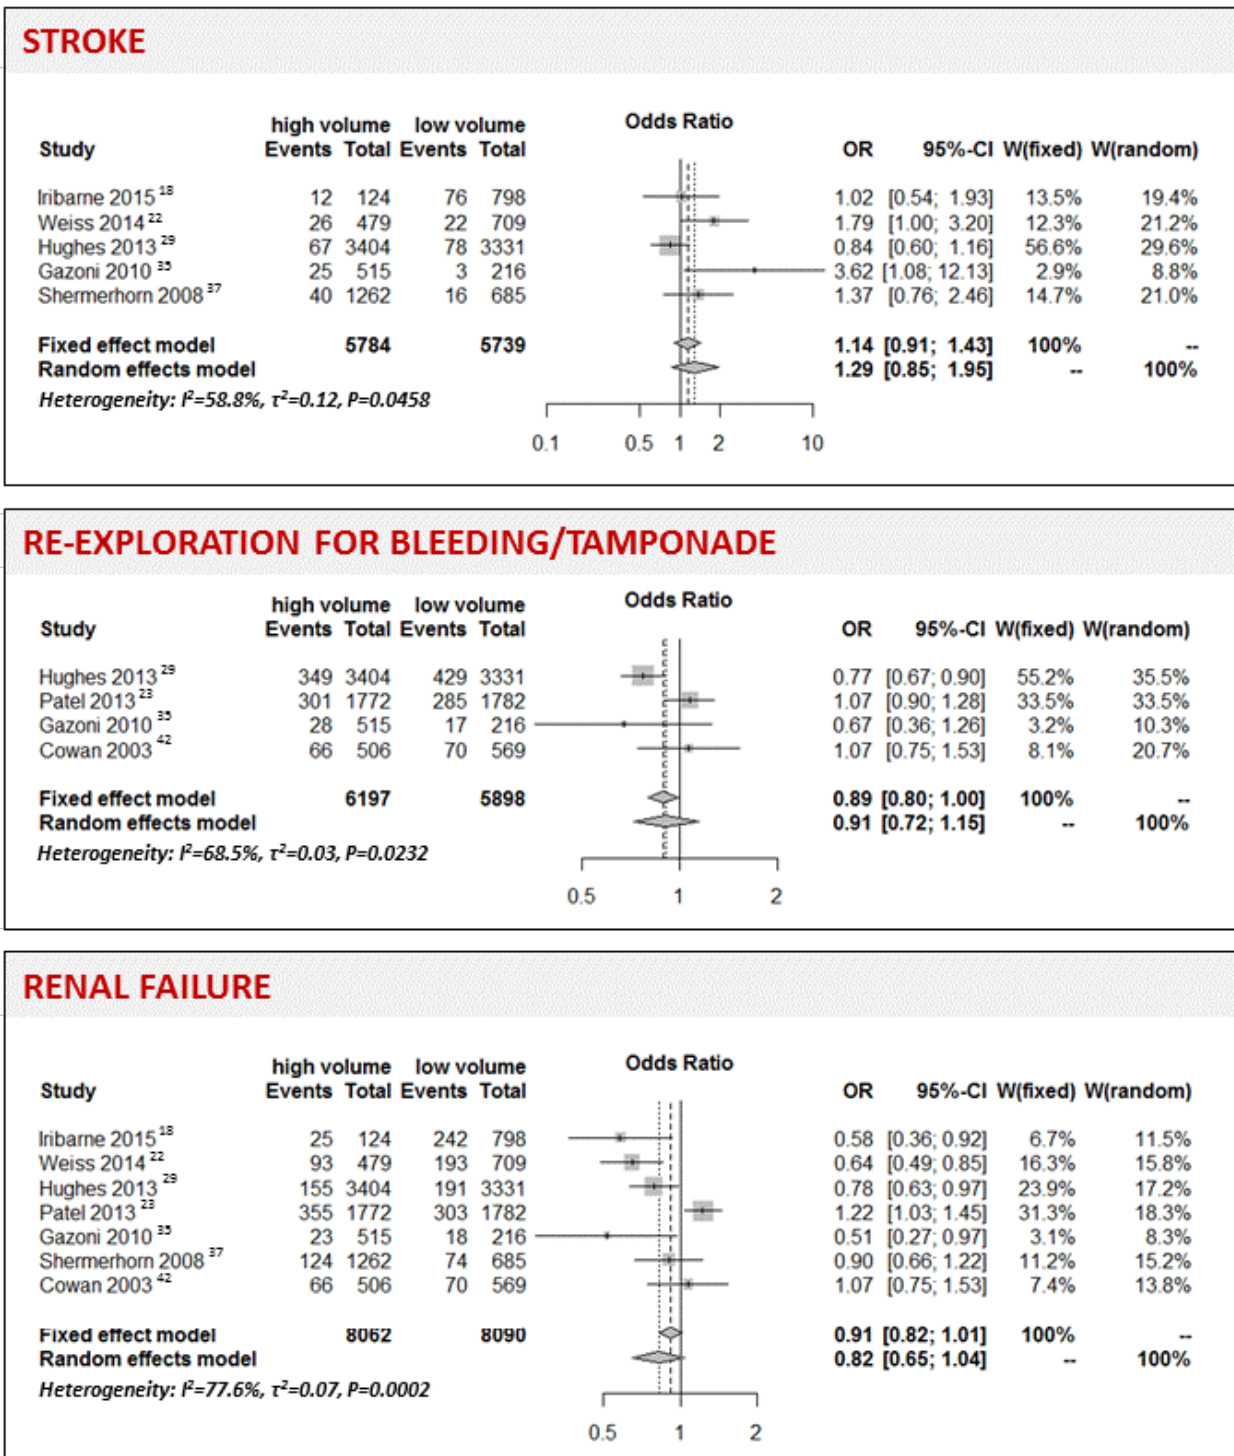

Abbreviations: CI, confidence interval; OR, odds ratio.

Figure S8. Forest plots comparing the effect of a multidisciplinary TAD program presence on outcomes

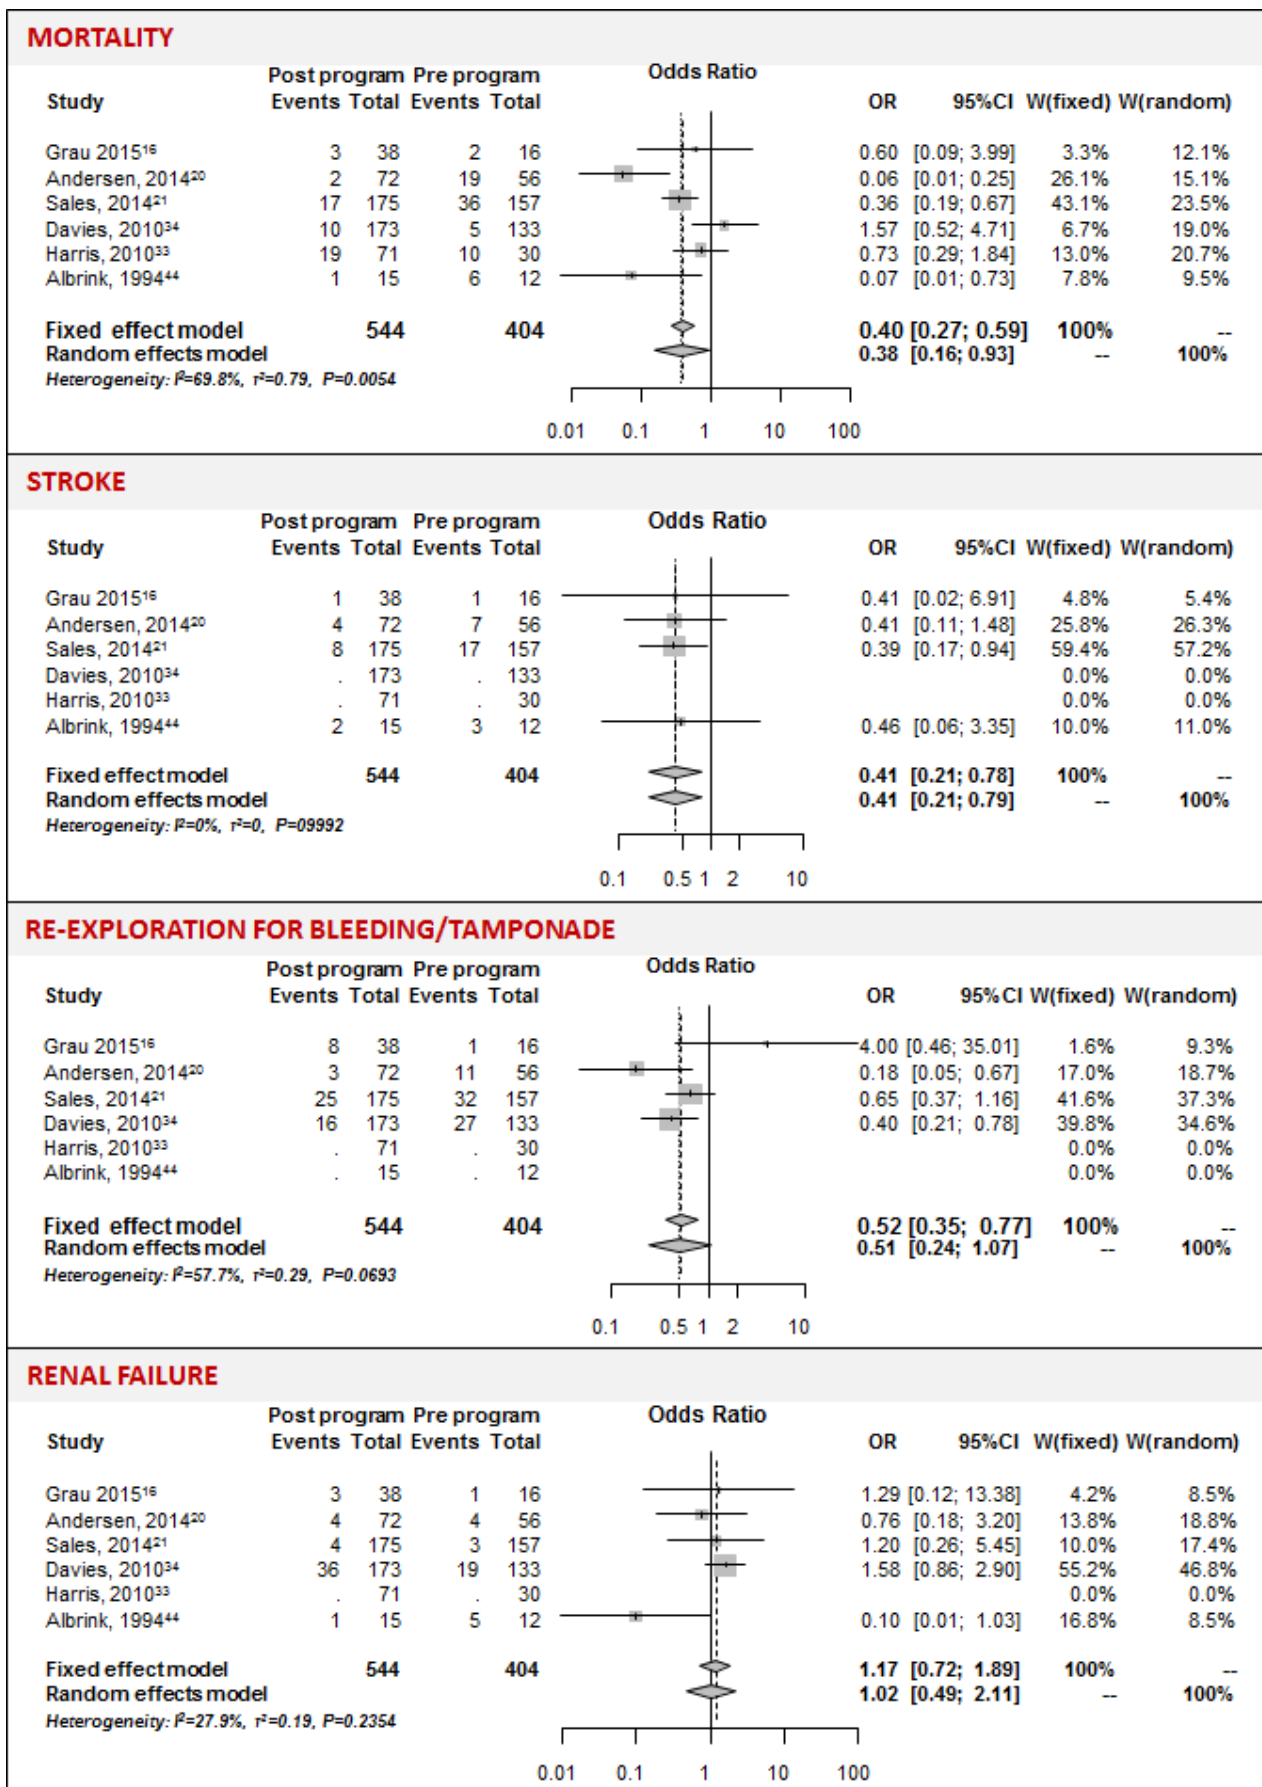

Abbreviations: CI, confidence interval; OR, odds ratio.

Figure S9. Forest plots comparing the effect of surgeon volume for hospital mortality and secondary outcomes

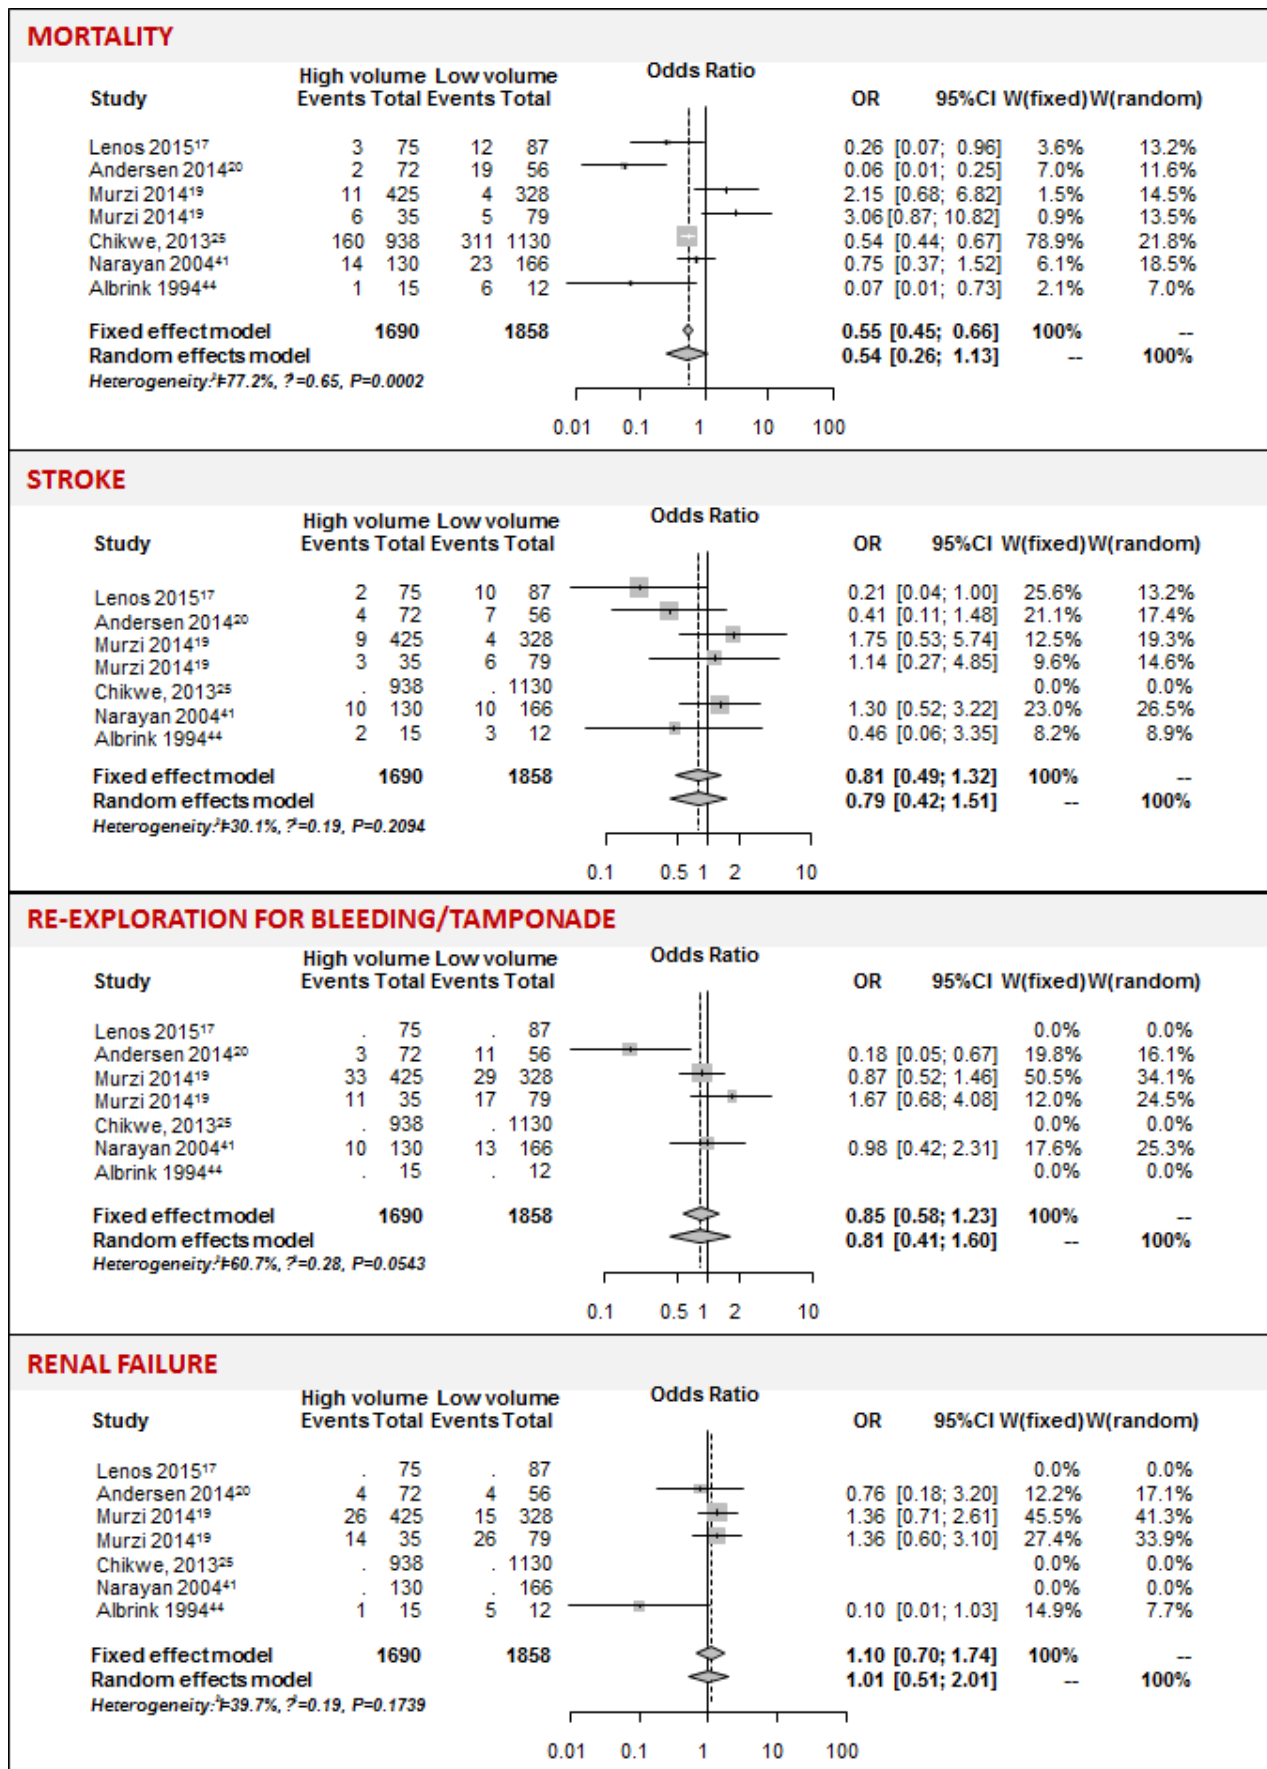

Abbreviations: CI, confidence interval; OR, odds ratio.

Figure S10. Forest plots comparing the effect of hospital status on hospital mortality

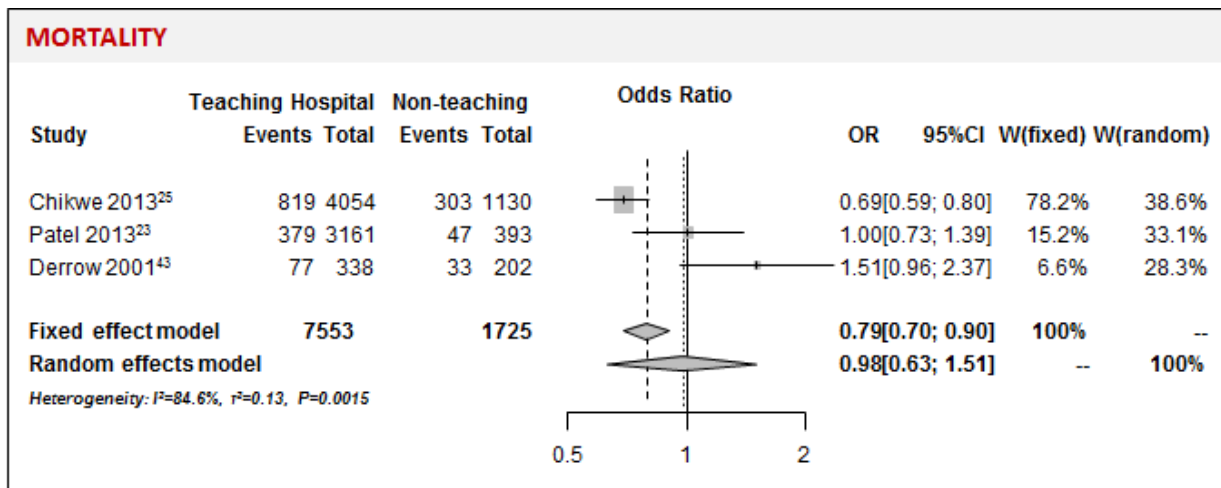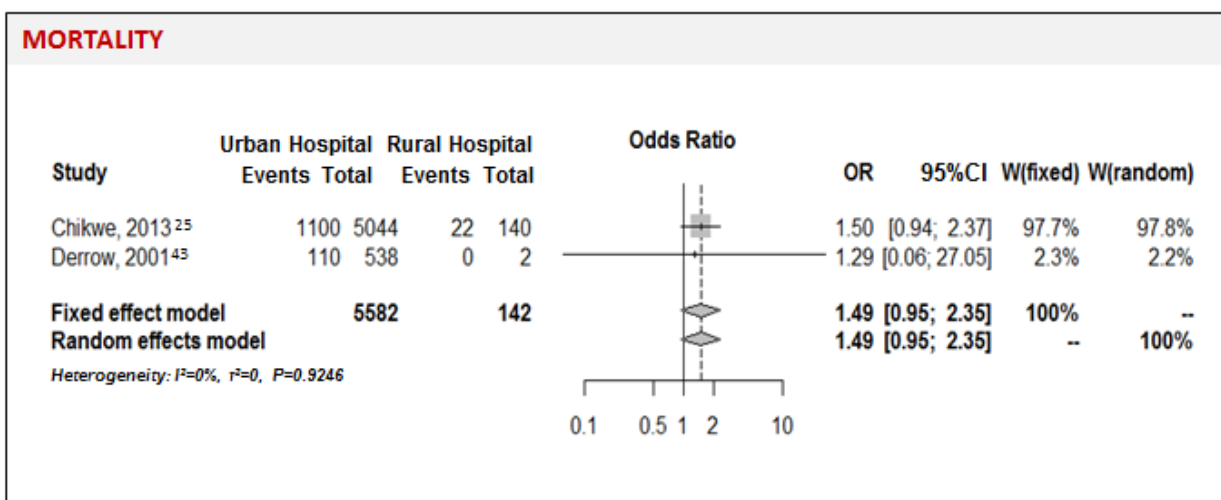

Abbreviations: CI, confidence interval; OR, odds ratio.



## Supplemental References

1. Benchimol EI, Smeeth L, Guttman A, Harron K, Moher D, Petersen I, Sørensen HT, von Elm E, Langan SM; RECORD Working Committee. The REporting of studies Conducted using Observational Routinely-collected health Data (RECORD) statement. *PLoS Med.* 2015;12:e1001885. doi:10.1371/journal.pmed.1001885.
2. <http://www.hscic.gov.uk/hes>. Accessed June 30, 2015.
3. Bridgewater B, Keogh B, Kinsman R, Walton P. The Society for Cardiothoracic Surgery in Great Britain & Ireland: the Sixth National Adult Cardiac Surgical Database Report. Henley-on-Thames, UK: Dendrite Clinical Systems Ltd, 2009. Available at: [http://www.scts.org/\\_userfiles/resources/SixthNACSDreport2008withcovers.pdf](http://www.scts.org/_userfiles/resources/SixthNACSDreport2008withcovers.pdf). Accessed June 30, 2015.
4. <http://www.ucl.ac.uk/nicor/audits/adultcardiac/documents/datasets/NACSAdatasetV4.1.2>.
5. Accessed April 30, 2015.
6. <http://www.ucl.ac.uk/nicor/audits/adultcardiac/documents/datasets/nacsacleaning10.3>. Accessed April 30, 2015.
7. Hickey GL, Grant SW, Cosgriff R, Dimarakis I, Pagano D, Kappetein AP, Bridgewater B. Clinical registries: governance, management, analysis and applications. *Eur J Cardiothorac Surg.* 2013;44:605-14. doi:10.1093/ejcts/ezt018.
8. Roques F, Michel P, Goldstone AR, Nashef SA. The logistic EuroSCORE. *Eur Heart J.* 2003;24:881-2. doi:10.1016/S0195-668X(02)00799-6.
9. von Elm E, Altman DG, Egger M, Pocock SJ, Gøtzsche PC, Vandenbroucke JP; STROBE Initiative. The Strengthening the Reporting of Observational Studies in Epidemiology (STROBE) statement: guidelines for reporting observational studies. *BMJ.* 2007;335:806-8. doi:10.1136/bmj.39335.541782.AD.
10. Stroup DF, Berlin JA, Morton SC, Olkin I, Williamson GD, Rennie D, Moher D, Becker BJ, Sipe TA, Thacker SB. Meta-analysis of observational studies in epidemiology: a proposal for reporting. Meta-analysis Of Observational Studies in Epidemiology (MOOSE) group. *JAMA.* 2000;283:2008-12. doi:10.1001/jama.283.15.2008.
11. Moher D, Liberati A, Tetzlaff J, Altman DG; PRISMA Group. Preferred reporting items for systematic reviews and meta-analyses: the PRISMA statement. *BMJ.* 2009;339:b2535. doi:10.1136/bmj.b2535.
12. Schaffer JM, Lingala B, Fischbein MP, Dake MD, Woo YJ, Mitchell RS, Miller DC. Midterm outcomes of open descending thoracic aortic repair in more than 5,000 Medicare patients. *Ann Thorac Surg.* 2015;100:2087-94. doi:10.1016/j.athoracsur.2015.06.068.
13. Schaffer JM, Lingala B, Miller DC, Woo YJ, Mitchell RS, Dake MD. Midterm survival after thoracic endovascular aortic repair in more than 10,000 Medicare patients. *J Thorac Cardiovasc Surg.* 2015;149:808-20. doi:10.1016/j.jtcvs.2014.10.036.
14. Bhatt P, Patel NJ, Patel A, Sonani R, Patel A, Panaich SS, Thakkar B, Savani C, Jhamnani S, Patel N, Patel N, Pant S, Patel S, Arora S, Dave A, Singh V, Chothani A, Patel J, Ansari M, Deshmukh A, Bhimani R, Grines C, Cleman M, Mangi A, Forrest JK, Badheka AO. Impact of hospital volume on outcomes of endovascular stenting for adult aortic coarctation. *Am J Cardiol.* 2015;116:1418-24. doi:10.1016/j.amjcard.2015.07.066.
15. Brat R, Gaj J, Barta J. Early and mid-term outcomes of the aortic arch surgery: experience from the low-volume centre. *J Cardiothorac Surg.* 2015;10:31. doi:10.1186/s13019-015-0229-6.
16. Grau JB, Kushner CE, Ferrari G, Wilson SR, Brizzio ME, Zapolanski A, Yallowitz J, Shaw RE. Effects of a protocol-based management of type A aortic dissections. *J Surg Res.* 2015;197:265-9. doi:10.1016/j.jss.2015.04.018.
17. Lenos A, Bougioukakis P, Irimie V, Zacher M, Diegeler A, Urbanski PP. Impact of surgical experience on outcome in surgery of acute type A aortic dissection. *Eur J Cardiothorac Surg.* 2015;48:491-6. doi:10.1093/ejcts/ezu454.
18. Iribarne A, Milner R, Merlo AE, Singh A, Saunders CR, Russo MJ. Outcomes following emergent open repair for thoracic aortic dissection are improved at higher volume centers. *J Card Surg.* 2015;30:74-9. doi:10.1111/jocs.12470.
19. Murzi M, Miceli A, Di Stefano G, Cerillo AG, Kallushi E, Farneti P, Solinas M, Glauber M. Enhancing quality control and performance monitoring in thoracic aortic surgery: a 10-year single institutional experience. *Eur J Cardiothorac Surg.* 2015;47:608-15. doi:10.1093/ejcts/ezu249.

20. Andersen ND, Ganapathi AM, Hanna JM, Williams JB, Gaca JG, Hughes GC. Outcomes of acute type a dissection repair before and after implementation of a multidisciplinary thoracic aortic surgery program. *J Am Coll Cardiol*. 2014;63:1796-803. . doi:10.1016/j.jacc.2013.10.085.
21. Sales Mda C, Frota Filho JD, Aguzzoli C, Souza LD, Rösler AM, Lucio EA, Leães PE, Pontes MR, Lucchese FA. Aortic Center: specialized care improves outcomes and decreases mortality. *Rev Bras Cir Cardiovasc*. 2014;29:494-504. doi: 10.5935/1678-9741.20140122.
22. Weiss A, Anderson JA, Green A, Chang DC, Kansal N. Hospital volume of thoracoabdominal aneurysm repair does not affect mortality in California. *Vasc Endovascular Surg*. 2014;48:378-82. doi:10.1177/1538574414540344.
23. Patel VI, Mukhopadhyay S, Ergul E, Aranson N, Conrad MF, Lamuraglia GM, Kwolek CJ, Cambria RP. Impact of hospital volume and type on outcomes of open and endovascular repair of descending thoracic aneurysms in the United States Medicare population. *J Vasc Surg*. 2013;58:346-54. doi:10.1016/j.jvs.2013.01.035.
24. Arnaoutakis DJ, Propper BW, Black JH 3rd, Schneider EB, Lum YW, Freischlag JA, Perler BA, Abularrage CJ. Racial and ethnic disparities in the treatment of unruptured thoracoabdominal aortic aneurysms in the United States. *J Surg Res*. 2013;184:651-7. . doi:10.1016/j.jss.2013.03.018.
25. Chikwe J, Cavallaro P, Itagaki S, Seigerman M, Diluozzo G, Adams DH. National outcomes in acute aortic dissection: influence of surgeon and institutional volume on operative mortality. *Ann Thorac Surg*. 2013;95:1563-9. doi:10.1016/j.athoracsur.2013.02.039.
26. Goodney PP, Brooke BS, Wallaert J, Travis L, Lucas FL, Goodman DC, Cronenwett JL, Stone DH. Thoracic endovascular aneurysm repair, race, and volume in thoracic aneurysm repair. *J Vasc Surg*. 2013;57:56-63. doi:10.1016/j.jvs.2012.07.036.
27. Soppa G, Abdulkareem N, Smelt J, Van Besouw JP, Jahangiri M. High-volume practice by a single specialized team reduces mortality and morbidity of elective and urgent aortic root replacement. *Aorta (Stamford)*. 2013;1:40-4. doi: 10.12945/j.aorta.2013.13.001.
28. Tsagakis K, Konorza T, Dohle DS, Kottenberg E, Buck T, Thielmann M, Erbel R, Jakob H. Hybrid operating room concept for combined diagnostics, intervention and surgery in acute type A dissection. *Eur J Cardiothorac Surg*. 2013;43:397-404. doi:10.12945/j.aorta.2013.13.001.
29. Hughes GC, Zhao Y, Rankin JS, Scarborough JE, O'Brien S, Bavaria JE, Wolfe WG, Gaca JG, Gammie JS, Shahian DM, Smith PK. Effects of institutional volumes on operative outcomes for aortic root replacement in NorthAmerica. *J Thorac Cardiovasc Surg*. 2013;145:166-70. doi:10.1016/j.jtcvs.2011.10.094.
30. Sakata R, Kuwano H, Yokomise H. Hospital volume and outcomes of cardiothoracic surgery in Japan: 2005-2009 national survey. *Gen Thorac Cardiovasc Surg*. 2012;60:625-38. doi:10.1007/s11748-012-0128-x.
31. Chavanon O, Baguet JP, Albaladéjo P, Blin D, Vanzetto G. Direct admission to the operating room: an efficient strategy for patients with diagnosed or highly suspected acute type A aortic dissection. *Can J Cardiol*. 2011;27:685-91. doi:10.1016/j.cjca.2011.01.014.
32. Gopaldas RR, Dao TK, LeMaire SA, Huh J, Coselli JS. Endovascular versus open repair of ruptured descending thoracic aortic aneurysms: a nationwide risk-adjusted study of 923 patients. *J Thorac Cardiovasc Surg*. 2011;142:1010-8. doi:10.1016/j.jtcvs.2011.08.014.
33. Harris KM, Strauss CE, Duval S, Unger BT, Kroshus TJ, Inampudi S, Cohen JD, Kapsner C, Boland LL, Eales F, Rohman E, Orlandi QG, Flavin TF, Kshetry VR, Graham KJ, Hirsch AT, Henry TD. Multidisciplinary standardized care for acute aortic dissection: design and initial outcomes of a regional care model. *Circ Cardiovasc Qual Outcomes*. 2010;3:424-30. doi:10.1161/CIRCOUTCOMES.109.920140.
34. Davies MG, Younes HK, Harris PW, Masud F, Croft BA, Reardon MJ, Lumsden AB. Outcomes before and after initiation of an acute aortic treatment center. *J Vasc Surg*. 2010;52:1478-85. doi:10.1161/CIRCOUTCOMES.109.920140.
35. Gazoni LM, Speir AM, Kron IL, Fonner E, Crosby IK. Elective thoracic aortic aneurysm surgery: better outcomes from high-volume centers. *J Am Coll Surg*. 2010;210:855-9. doi:10.1016/j.jamcollsurg.2010.01.013.
36. Miyata H, Motomura N, Ueda Y, Tsukihara H, Tabayashi K, Takamoto S. Toward quality improvement of thoracic aortic surgery: estimating volume-outcome effect from nationwide survey. *Eur J Cardiothorac Surg*. 2009;36:517-21. doi:10.1016/j.ejcts.2009.03.020.
37. Schermerhorn ML, Giles KA, Hamdan AD, Dalhberg SE, Hagberg R, Pomposelli F. Population-based outcomes of open descending thoracic aortic aneurysm repair. *J Vasc Surg*. 2008;48:821-7. doi:10.1016/j.jvs.2008.05.022.

38. Knipp BS, Deeb GM, Prager RL, Williams CY, Upchurch GR Jr, Patel HJ. A contemporary analysis of outcomes for operative repair of type A aortic dissection in the United States. *Surgery*. 2007;142:524-8. doi:10.1016/j.surg.2007.07.012.
39. Committee for Scientific Affairs, Kazui T, Osada H, Fujita H. An attempt to analyze the relation between hospital surgical volume and clinical outcome. *Gen Thorac Cardiovasc Surg*. 2007;55:483-92. doi:10.1007/s11748-007-0172-0.
40. Rigberg DA, McGory ML, Zingmond DS, Maggard MA, Agustin M, Lawrence PF, Ko CY. Thirty-day mortality statistics underestimate the risk of repair of thoracoabdominal aortic aneurysms: a statewide experience. *J Vasc Surg*. 2006;43:217-22. doi:10.1016/j.jvs.2005.10.070.
41. Narayan P, Caputo M, Rogers CA, Alwair H, Mahesh B, Angelini GD, Bryan AJ. Early and mid-term outcomes of surgery of the ascending aorta/arch: is there a relationship with caseload? *Eur J Cardiothorac Surg*. 2004;25:676-82. doi: 10.1016/j.ejcts.2004.01.011.
42. Cowan JA Jr, Dimick JB, Henke PK, Huber TS, Stanley JC, Upchurch GR Jr. Surgical treatment of intact thoracoabdominal aortic aneurysms in the United States: hospital and surgeon volume-related outcomes. *J Vasc Surg*. 2003;37:1169-74. doi:10.1016/S0741-5214(03)00085-5.
43. Derrow AE, Seeger JM, Dame DA, Carter RL, Ozaki CK, Flynn TC, Huber TS. The outcome in the United States after thoracoabdominal aortic aneurysm repair, renal artery bypass, and mesenteric revascularization. *J Vasc Surg*. 2001;34:54-61. doi: 10.1067/mva.2001.115596.
44. Albrink MH, Rodriguez E, England GJ, McKeown PP, Hurst JM, Rosemurgy AS 2nd. Importance of designated thoracic trauma surgeons in the management of traumatic aortic transection. *South Med J*. 1994;87:497-501.
